# Supplementary material for: One-pot synthesis of N-heterocycles and enimino carbocycles by tandem dehydrative coupling–reductive cyclization of halo-sec-amides and dehydrative cyclization of olefinic sec-amides
Source: Royal Society of Chemistry journal article supplement (doi:10.1039/c6qo00720a), 2016-12-17

*Electronic Supplementary Information for*

**One-pot Synthesis of *N*-Heterocycles and Enimino Carbocycles by  
Tandem Dehydrative Coupling - Reductive Cyclization of  
Halo-*sec*-amides and Dehydrative Cyclization of Olefinic *sec*-Amides**

Pei-Qiang Huang,\* Ying-Hong Huang, and Shu-Ren Wang

*Department of Chemistry, Fujian Provincial Key Laboratory of Chemical Biology,  
iChEM (Collaborative Innovation Center of Chemistry for Energy Materials), College  
of Chemistry and Chemical Engineering, Xiamen University, Xiamen, Fujian 361005,  
P. R. China*

**Table of Contents**

|                                                                     |               |
|---------------------------------------------------------------------|---------------|
| <b><sup>1</sup>H and <sup>13</sup>C NMR Spectra of all products</b> | <b>S1-S30</b> |
|---------------------------------------------------------------------|---------------|

$^1\text{H}$  NMR spectrum of **4a** ( $\text{CDCl}_3$ )

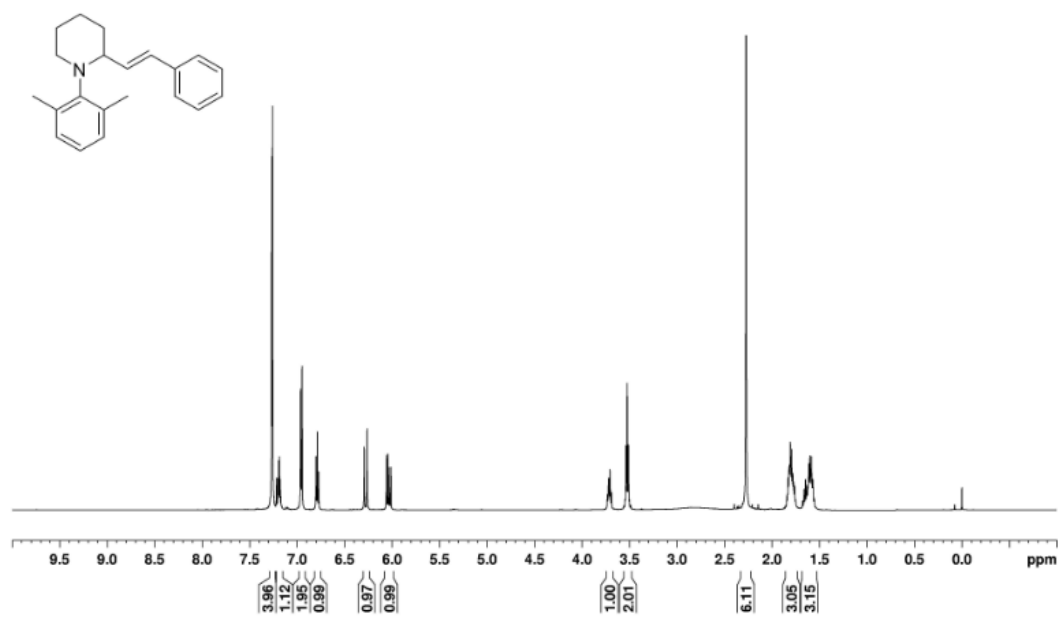

$^{13}\text{C}$  NMR spectrum of **4a** ( $\text{CDCl}_3$ )

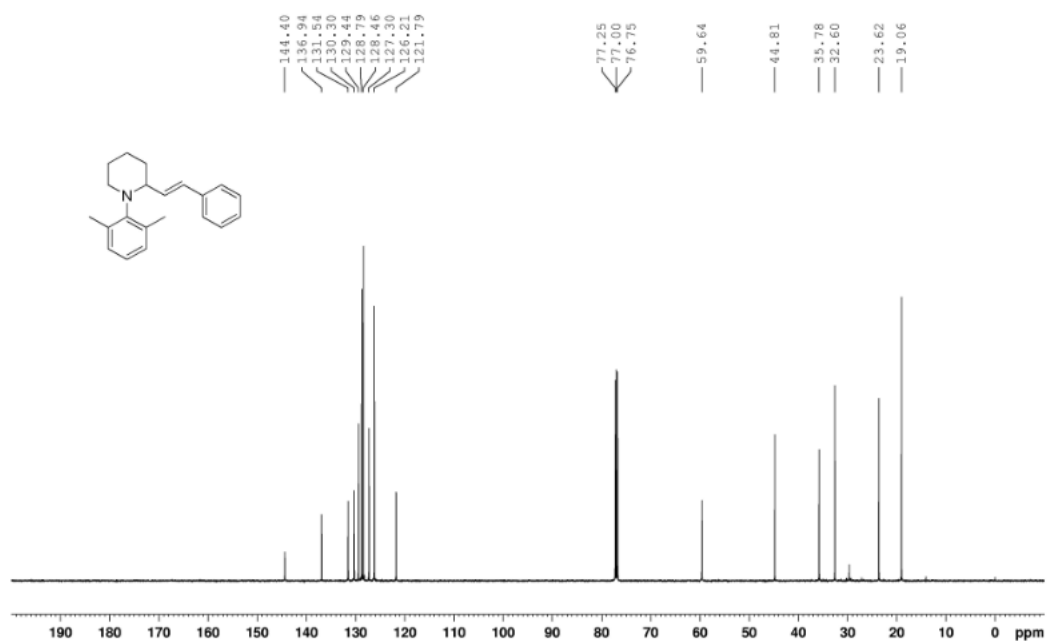

<sup>1</sup>H NMR spectrum of **4b** (CDCl<sub>3</sub>)

Sample:HYHD40-PROTON256  
CDCl<sub>3</sub>  
Date:2013-06-26

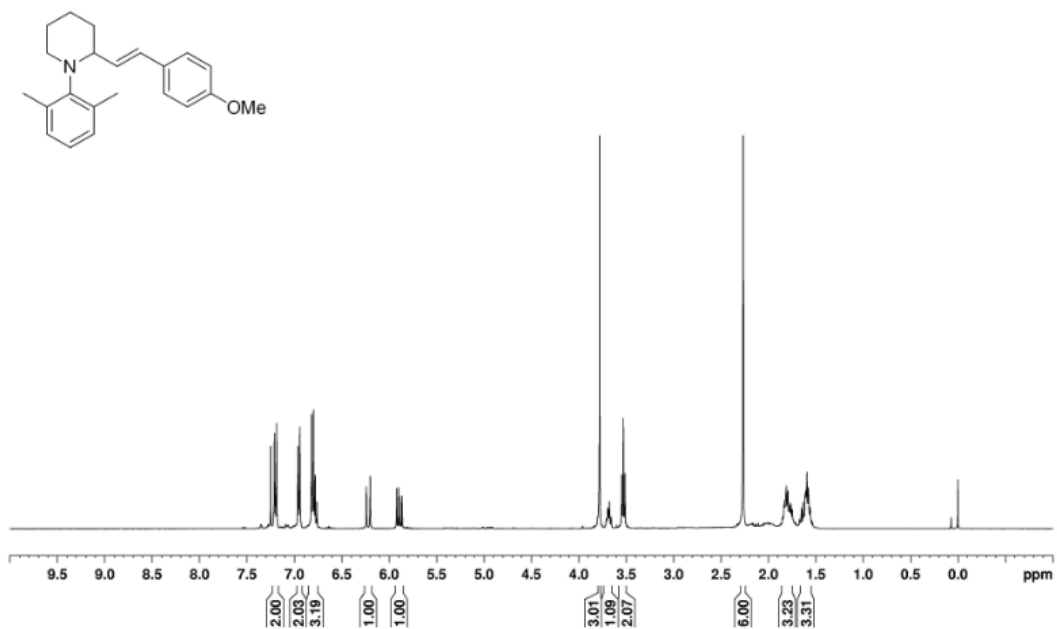

<sup>13</sup>C NMR spectrum of **4b** (CDCl<sub>3</sub>)

Sample:HYHD4002-C13C  
CDCl<sub>3</sub>  
Date:2013-06-26

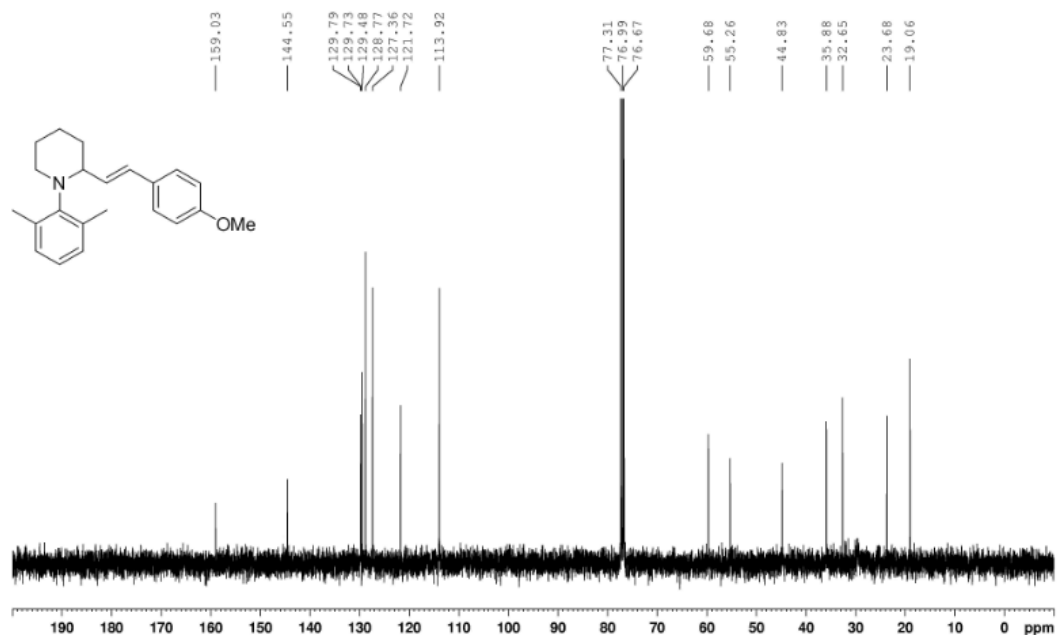

$^1\text{H}$  NMR spectrum of **4c** ( $\text{CDCl}_3$ )

Sample:HYHD142-PROTON256  
CDCl<sub>3</sub>  
Date:2013-10-23

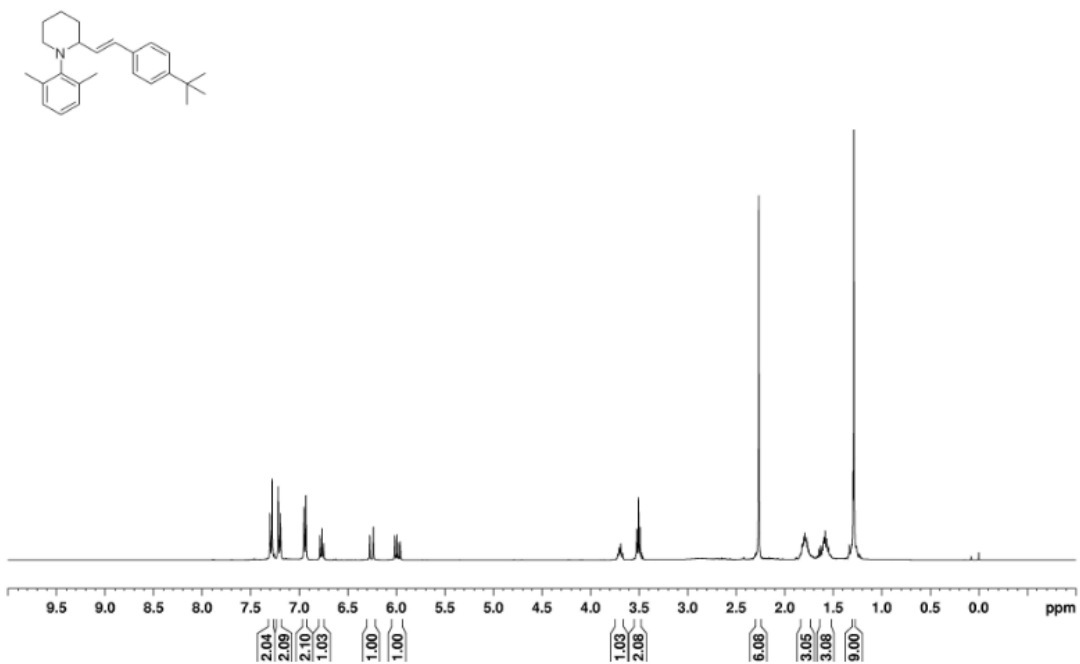

$^{13}\text{C}$  NMR spectrum of **4c** ( $\text{CDCl}_3$ )

Sample:HYHD142-C-C13  
CDCl<sub>3</sub>  
Date:2013-10-23

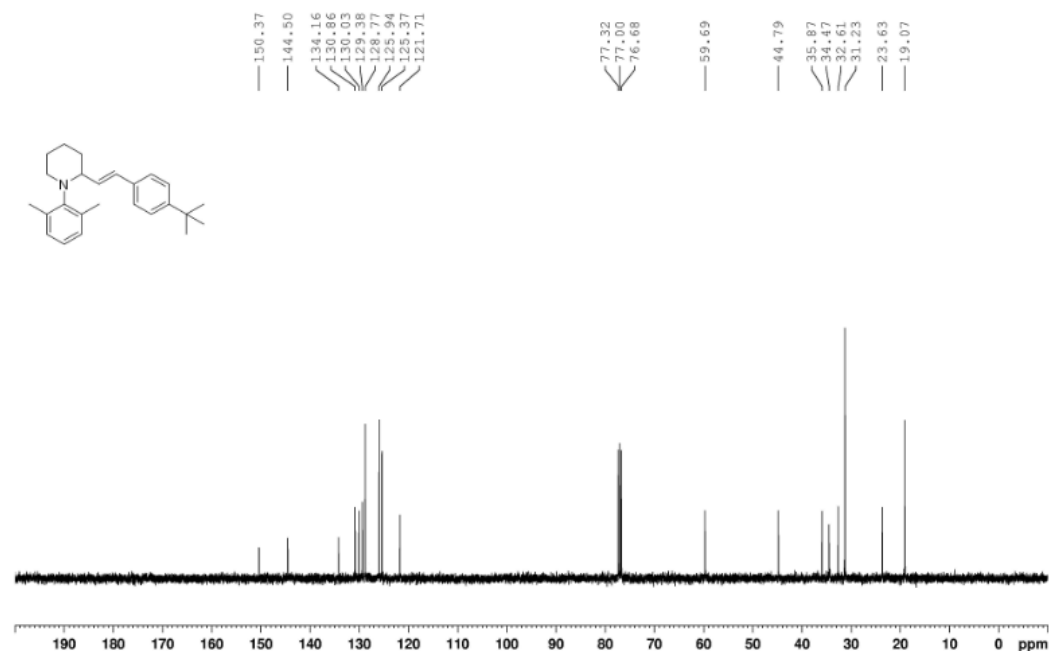

<sup>1</sup>H NMR spectrum of **4d** (CDCl<sub>3</sub>)

Sample:HYHD39-PROTON256  
CDCl<sub>3</sub>  
Date:2013-06-26

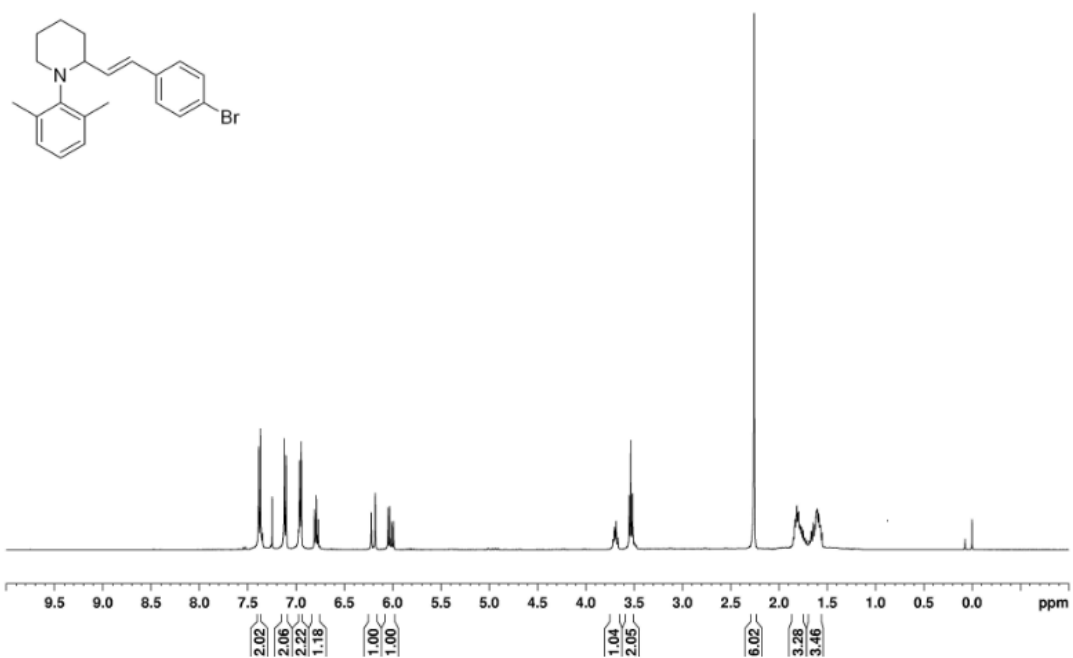

<sup>13</sup>C NMR spectrum of **4d** (CDCl<sub>3</sub>)

Sample:HYHD39-C13CPD  
CDCl<sub>3</sub>  
Date:2013-06-26

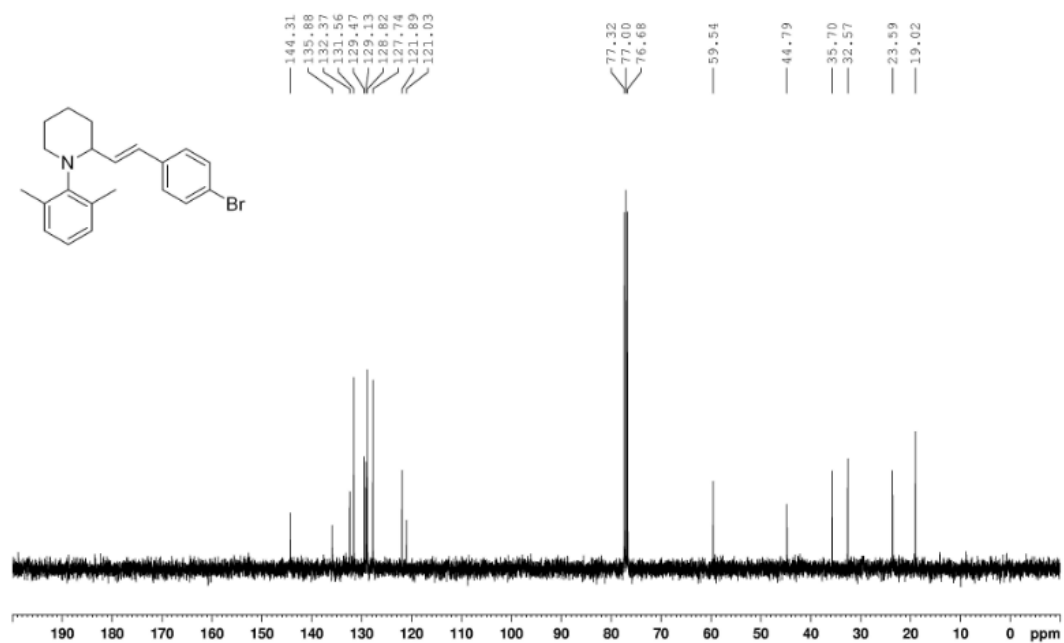

$^1\text{H}$  NMR spectrum of **4e** ( $\text{CDCl}_3$ )

Sample:HYHD38-PROTON256  
CDCl<sub>3</sub>  
Date:2013-06-26

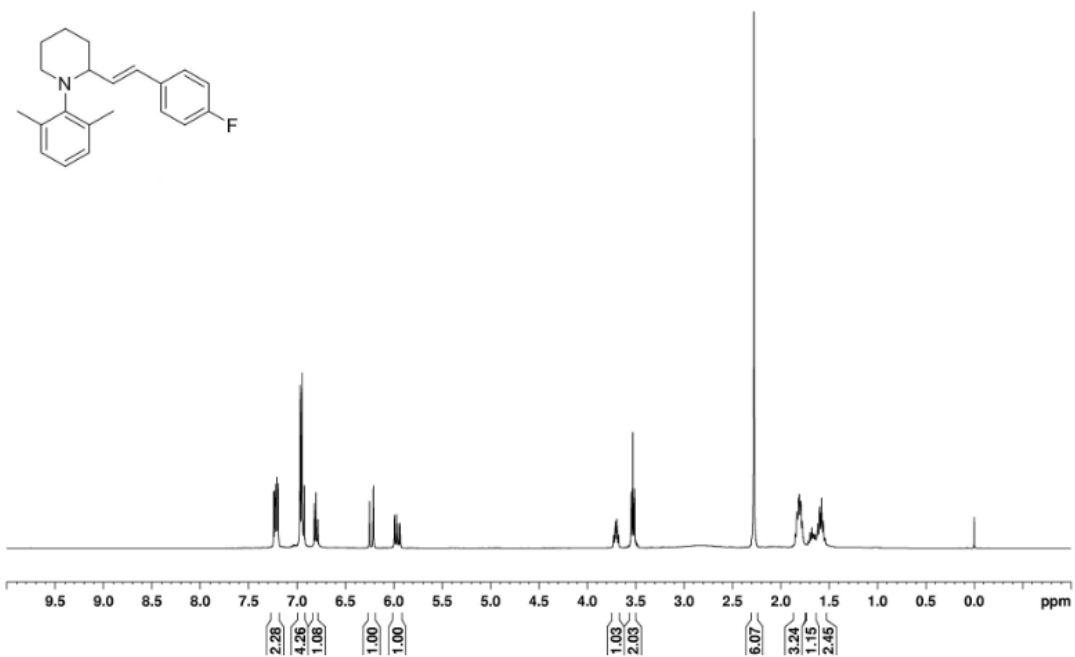

$^{13}\text{C}$  NMR spectrum of **4e** ( $\text{CDCl}_3$ )

Sample:HYHD38-C13CPD  
CDCl<sub>3</sub>  
Date:2013-06-26

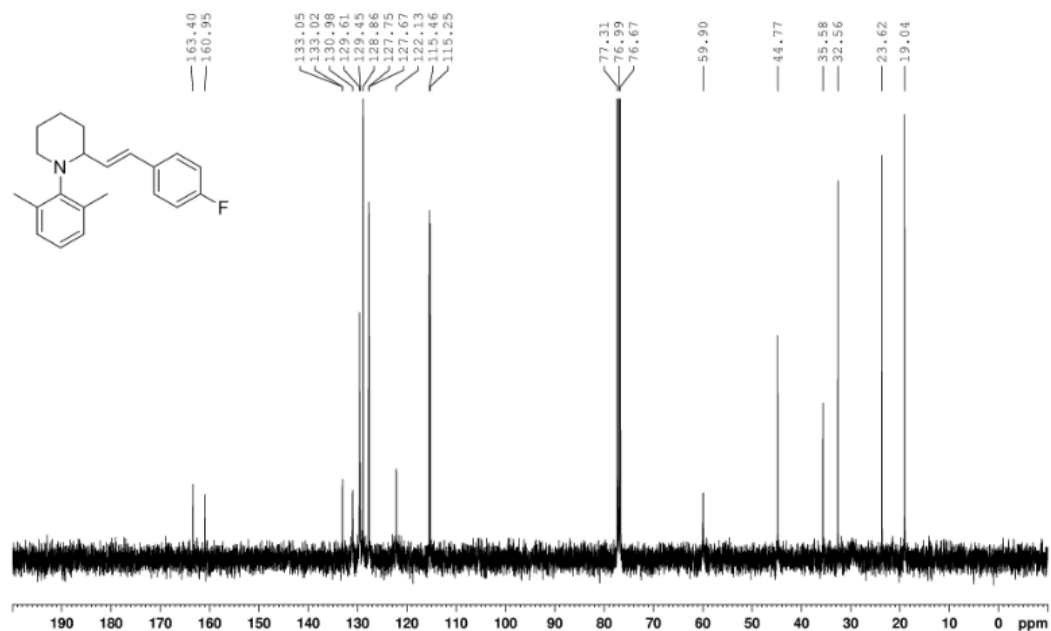

$^1\text{H}$  NMR spectrum of **4f** ( $\text{CDCl}_3$ )

Sample:HYHD127-PROTON25  
CDCl<sub>3</sub>  
Date:2013-10-13

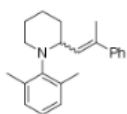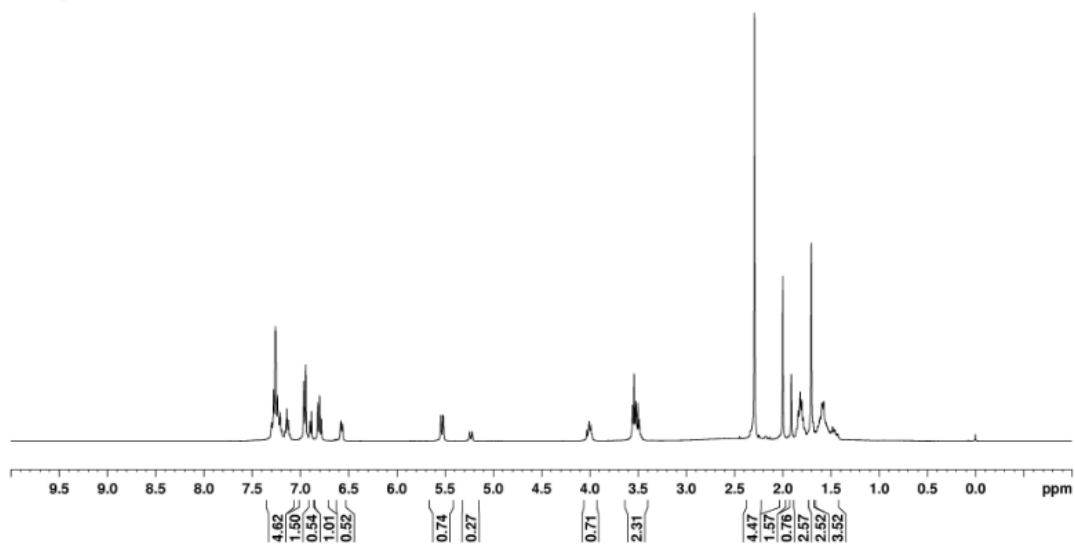

$^{13}\text{C}$  NMR spectrum of **4f** ( $\text{CDCl}_3$ )

Sample:HYHD127-C13CPD  
CDCl<sub>3</sub>  
Date:2013-10-13

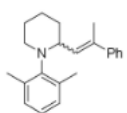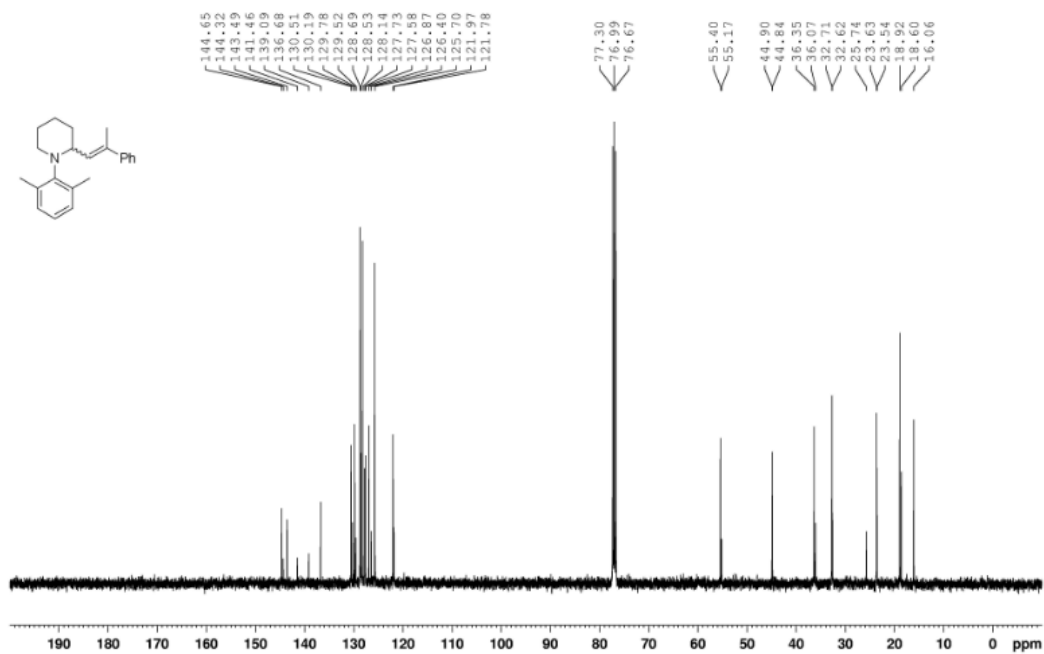

$^1\text{H}$  NMR spectrum of **4g** ( $\text{CDCl}_3$ )

Sample:HYHD128-PROTON256  
CDCl<sub>3</sub>  
Date:2013-10-13

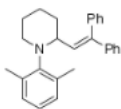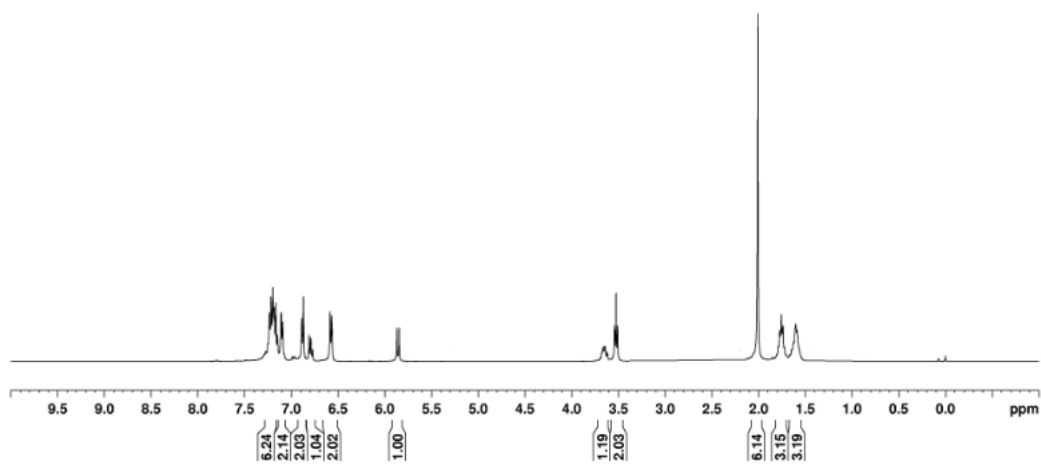

$^{13}\text{C}$  NMR spectrum of **4g** ( $\text{CDCl}_3$ )

Sample:HYHD128-C13CP  
CDCl<sub>3</sub>  
Date:2013-10-13

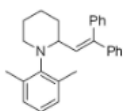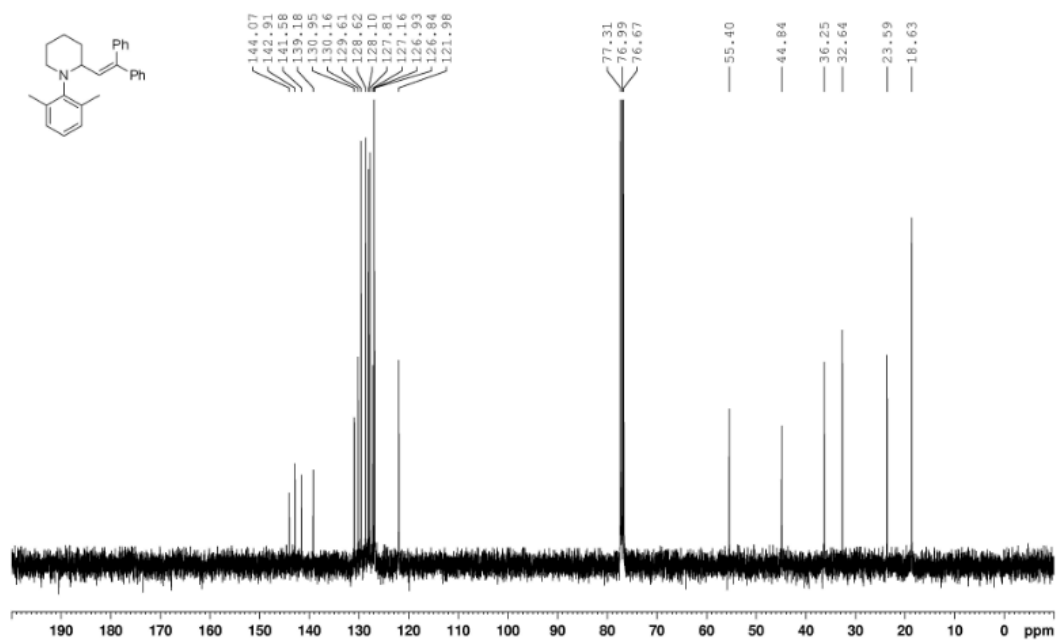



<sup>1</sup>H NMR spectrum of **4h** (CDCl<sub>3</sub>)

Sample:HYHD129-PROTON25  
CDCl<sub>3</sub>  
Date:2013-10-12

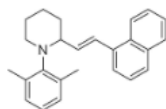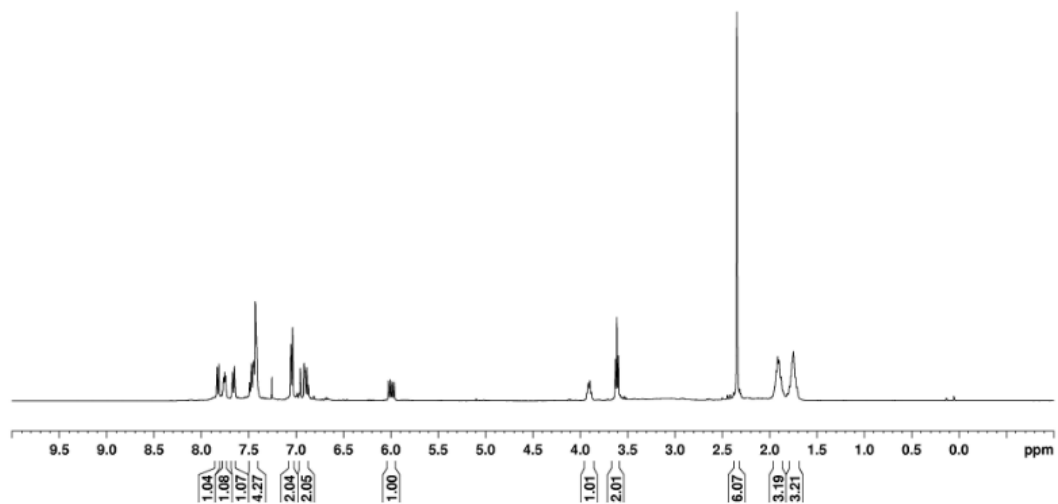

<sup>13</sup>C NMR spectrum of **4h** (CDCl<sub>3</sub>)

Sample:HYHD129-C13CP  
CDCl<sub>3</sub>  
Date:2013-10-12

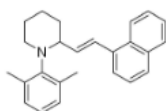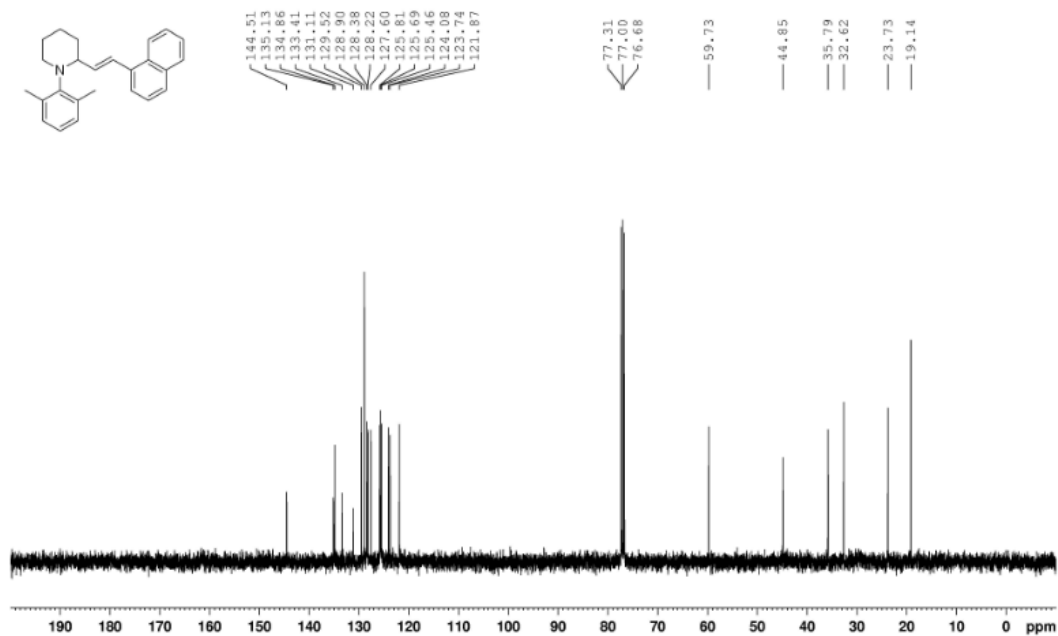

$^1\text{H}$  NMR spectrum of **4i** ( $\text{CDCl}_3$ )

Sample:HYHF41-PROTON256  
CDCl<sub>3</sub>  
Date:2014-04-04

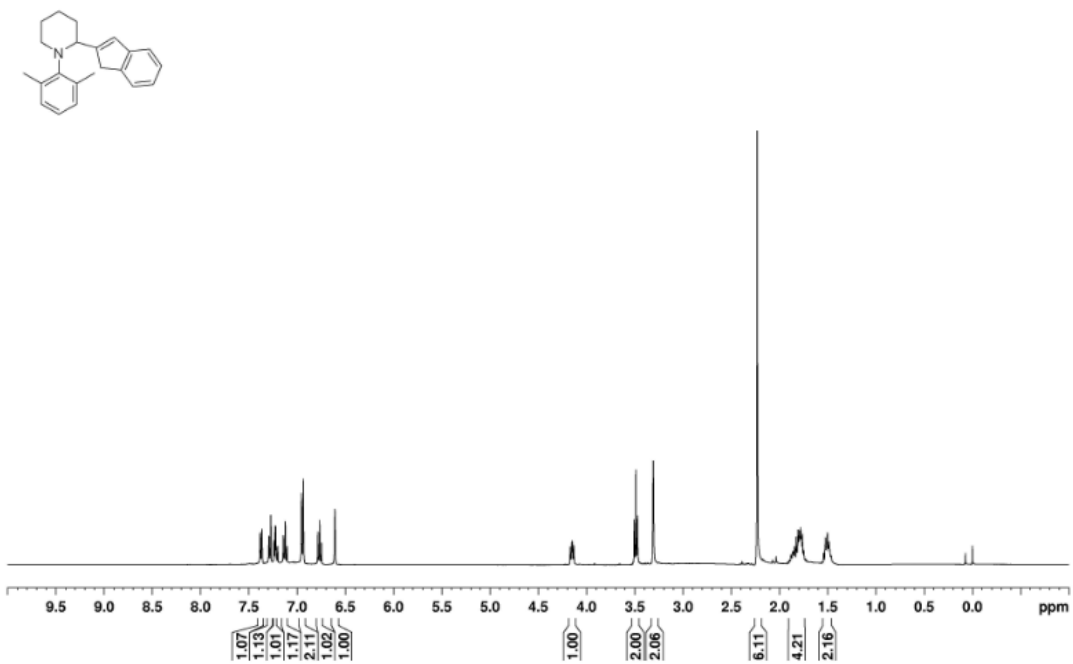

$^{13}\text{C}$  NMR spectrum of **4i** ( $\text{CDCl}_3$ )

Sample:HYHF41-C13CPD  
CDCl<sub>3</sub>  
Date:2014-04-04

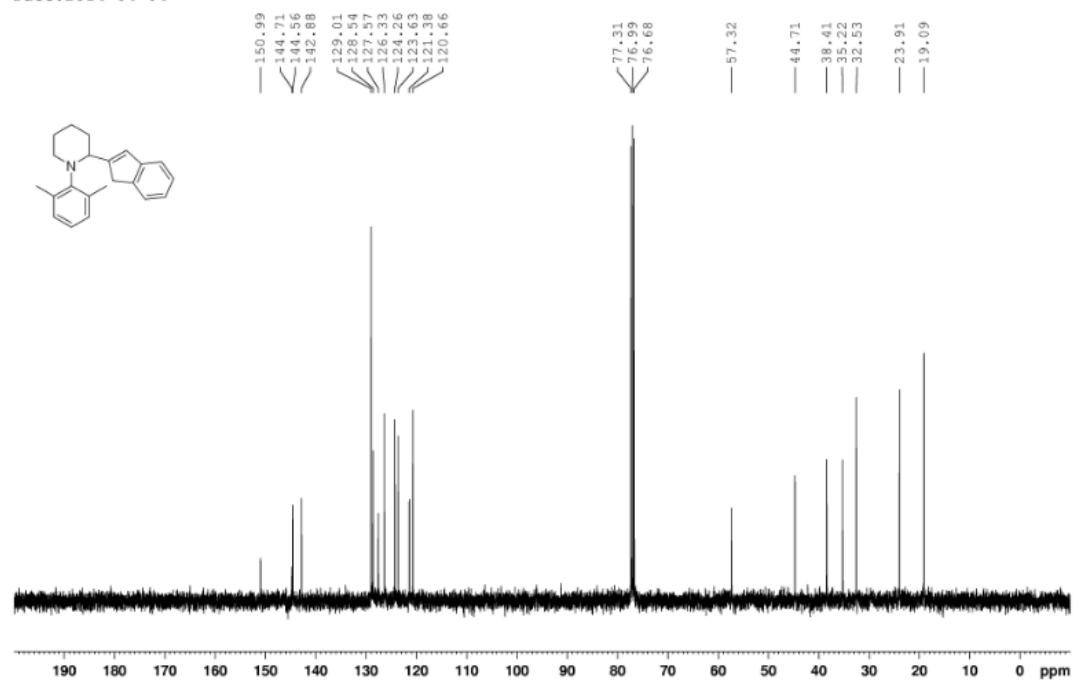

$^1\text{H}$  NMR spectrum of **4j** ( $\text{CDCl}_3$ )

Sample: HYHD41-PROTON256  
CDCl<sub>3</sub>  
Date: 2013-06-26

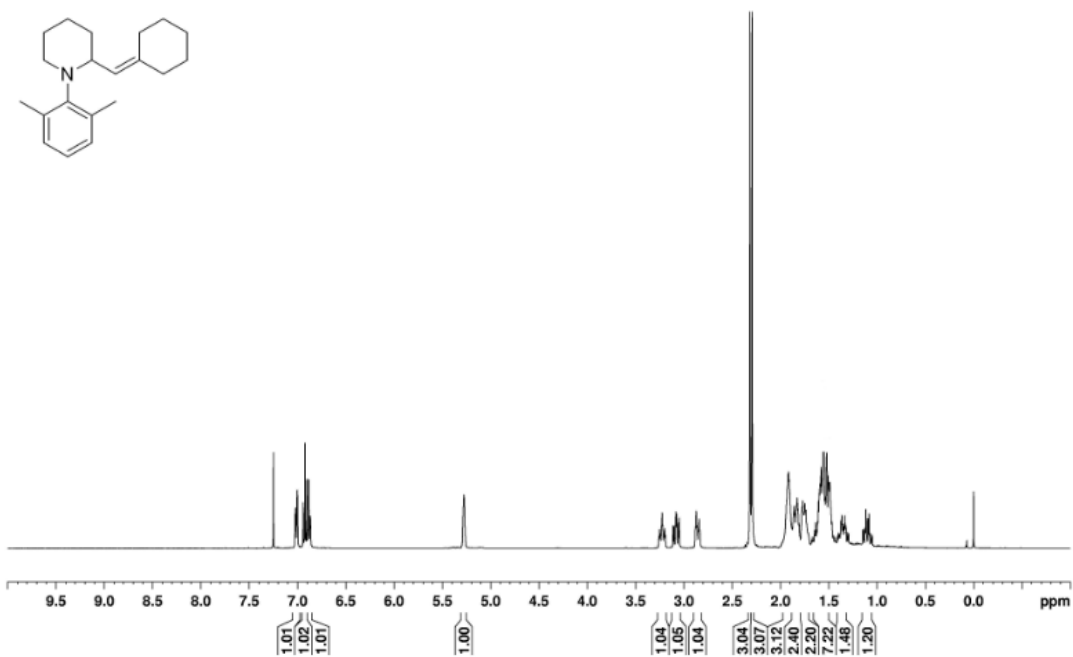

$^{13}\text{C}$  NMR spectrum of **4j** ( $\text{CDCl}_3$ )

Sample: HYHD41-C13CPD  
CDCl<sub>3</sub>  
Date: 2013-06-26

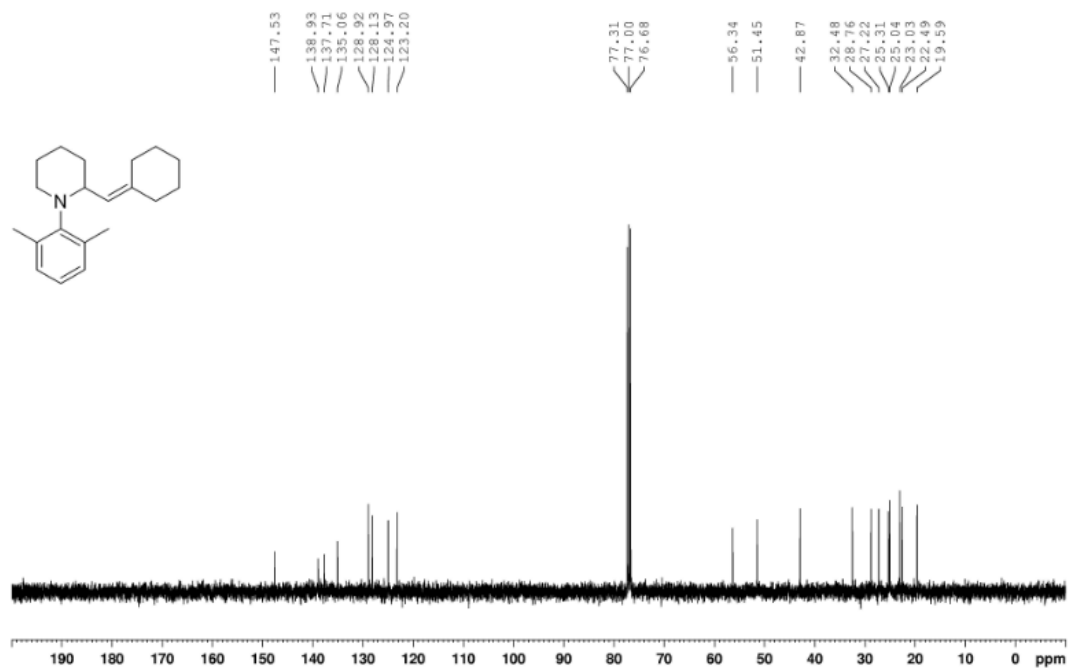

$^1\text{H}$  NMR spectrum of **4k** ( $\text{CDCl}_3$ )

Sample:HYHF43-PROTON256  
CDCl<sub>3</sub>  
Date:2014-04-04

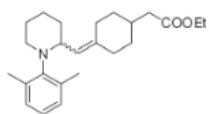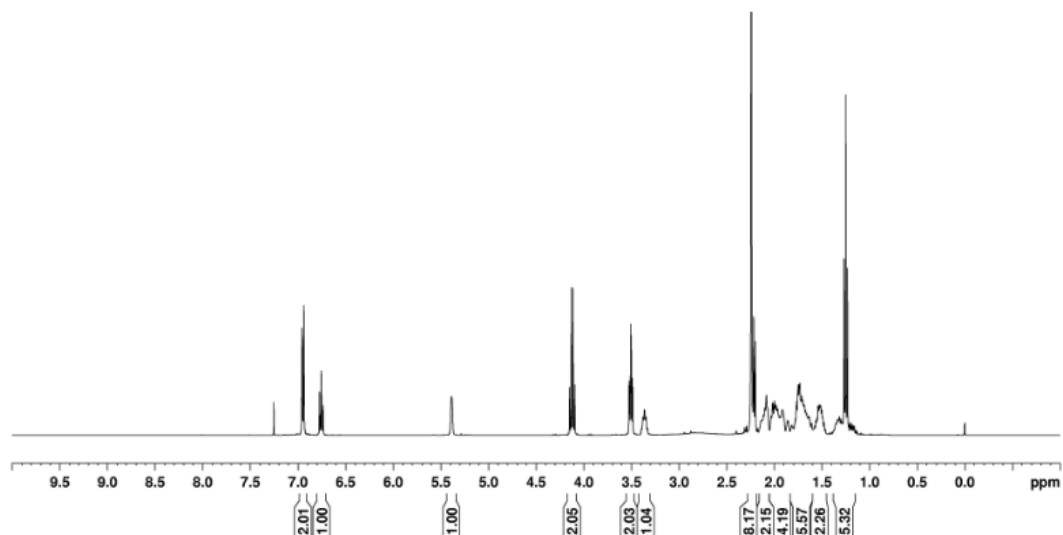

$^{13}\text{C}$  NMR spectrum of **4k** ( $\text{CDCl}_3$ )

Sample:HYHF43-C13CPD  
CDCl<sub>3</sub>  
Date:2014-04-04

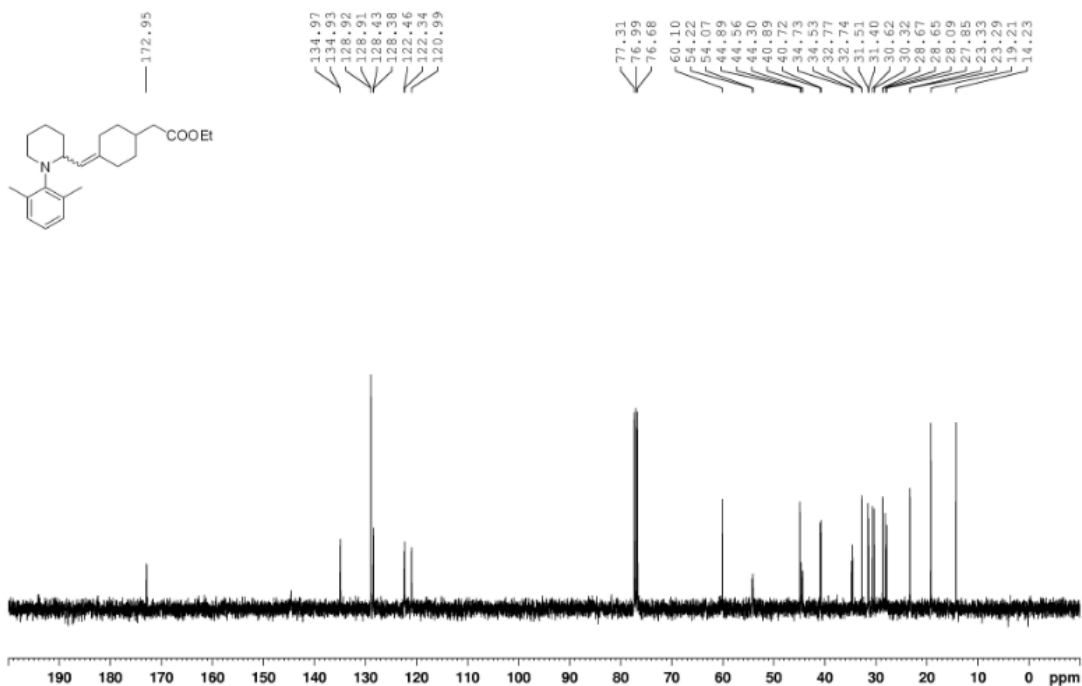

<sup>1</sup>H NMR spectrum of **4I** (CDCl<sub>3</sub>)

Sample:HYHF42-PROTON256  
CDCl<sub>3</sub>  
Date:2014-04-04

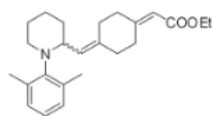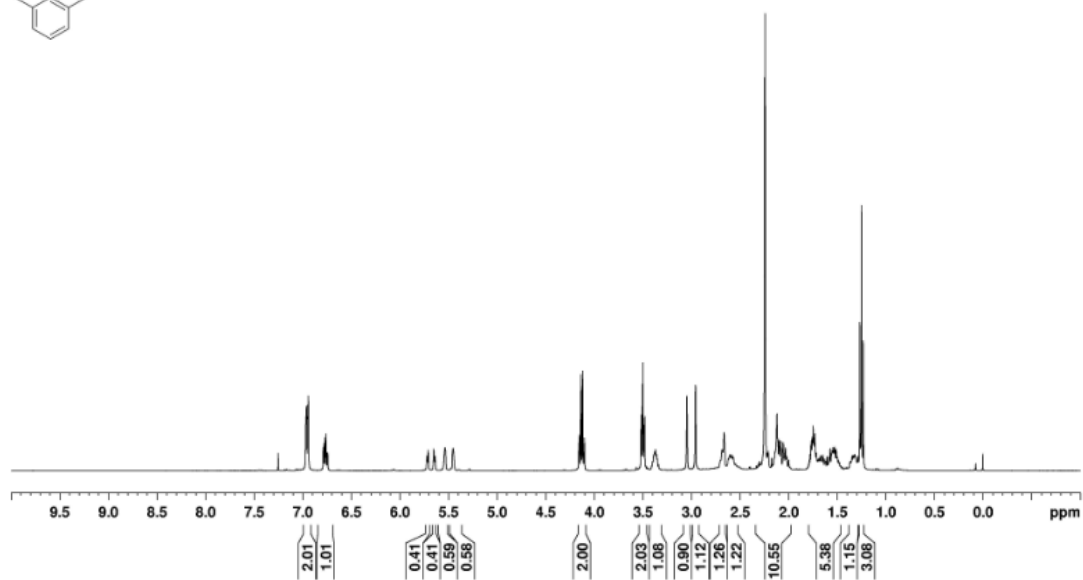

<sup>13</sup>C NMR spectrum of **4I** (CDCl<sub>3</sub>)

Sample:HYHF42-C13CPD  
CDCl<sub>3</sub>  
Date:2014-04-04

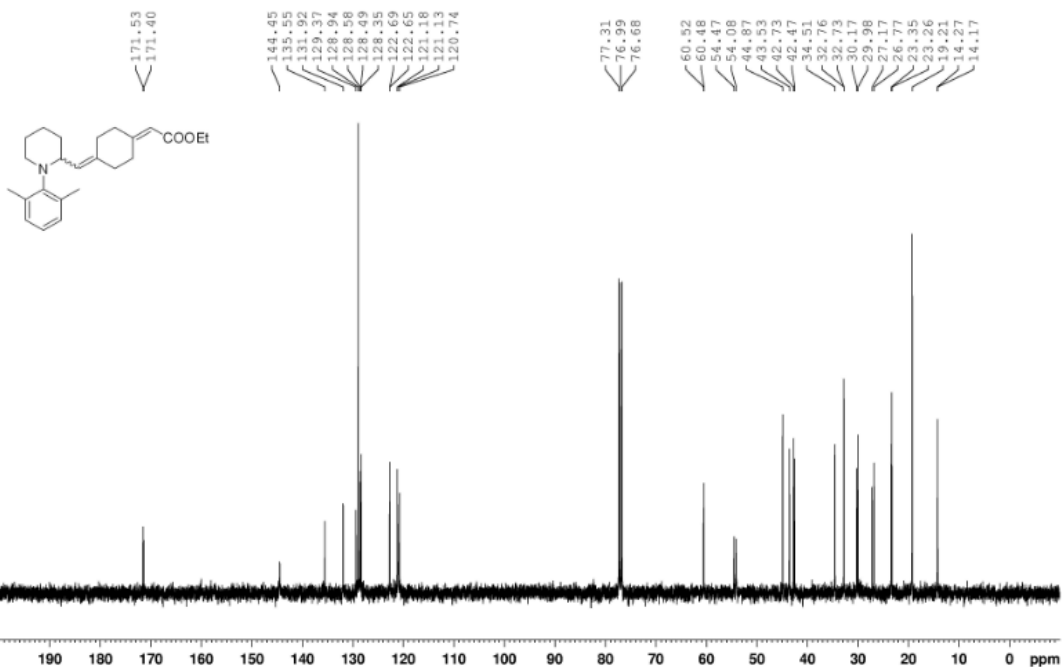

$^1\text{H}$  NMR spectrum of **4A<sub>1</sub>** ( $\text{CDCl}_3$ )

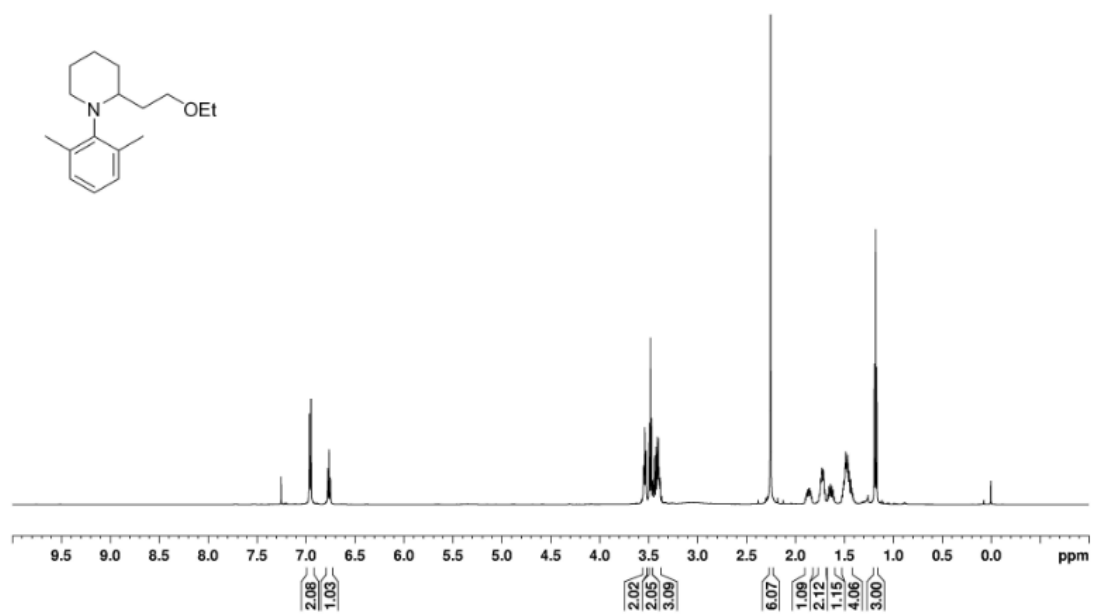

$^{13}\text{C}$  NMR spectrum of **4A<sub>1</sub>** ( $\text{CDCl}_3$ )

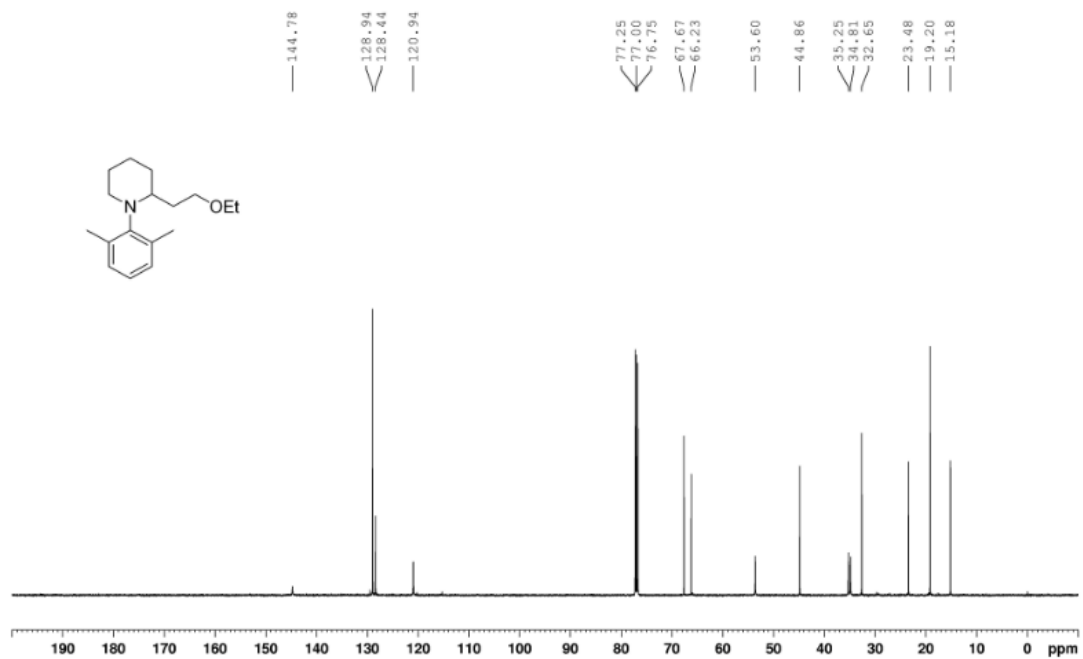

<sup>1</sup>H NMR spectrum of **4A<sub>2</sub>** (CDCl<sub>3</sub>)

Sample:HYHD136-A-PROTON256  
CDCl<sub>3</sub>  
Date:2013-11-09

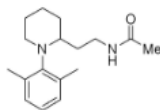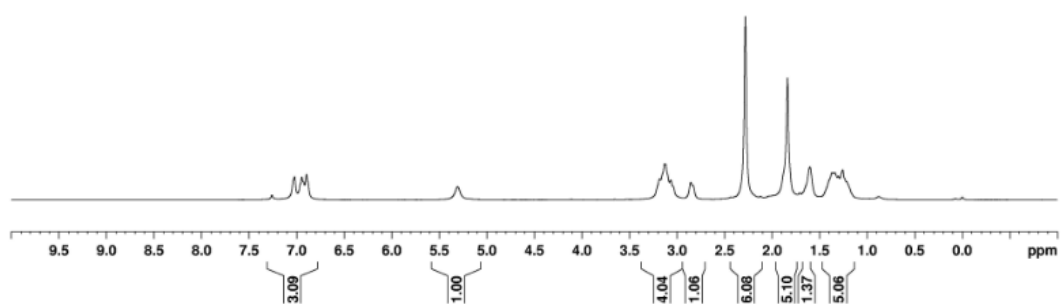

<sup>13</sup>C NMR spectrum of **4A<sub>2</sub>** (CDCl<sub>3</sub>)

Sample:HYHD136-C13CPD  
CDCl<sub>3</sub>  
Date:2013-11-09

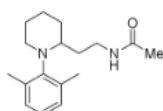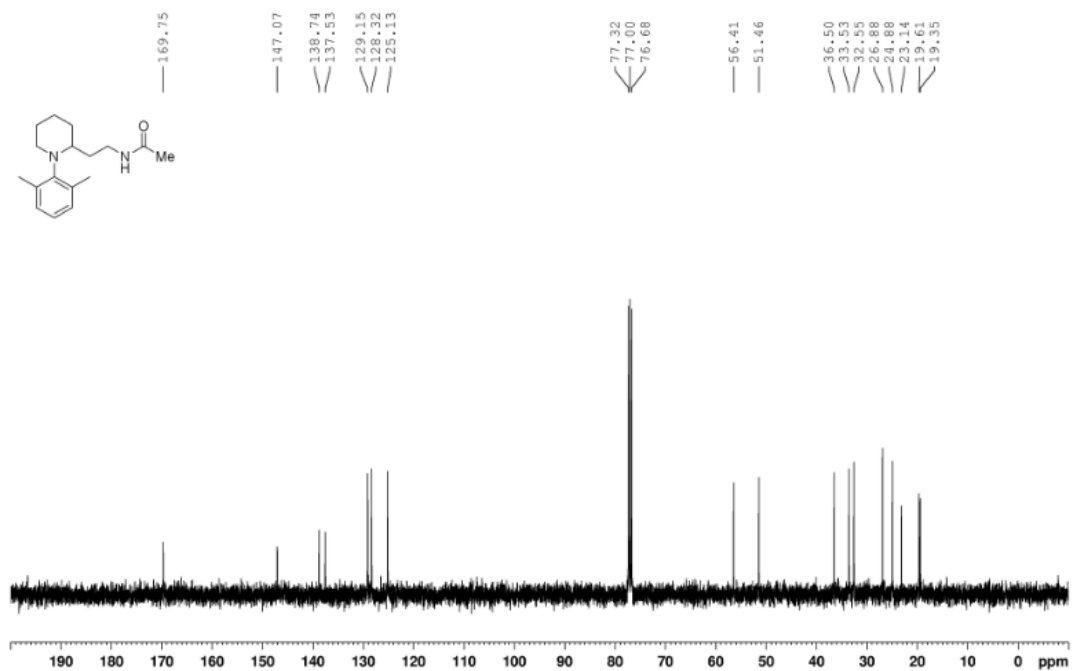

$^1\text{H}$  NMR spectrum of **4A<sub>3</sub>** ( $\text{CDCl}_3$ )

Sample:HYHF44-PROTON256  
CDCl<sub>3</sub>  
Date:2014-04-15

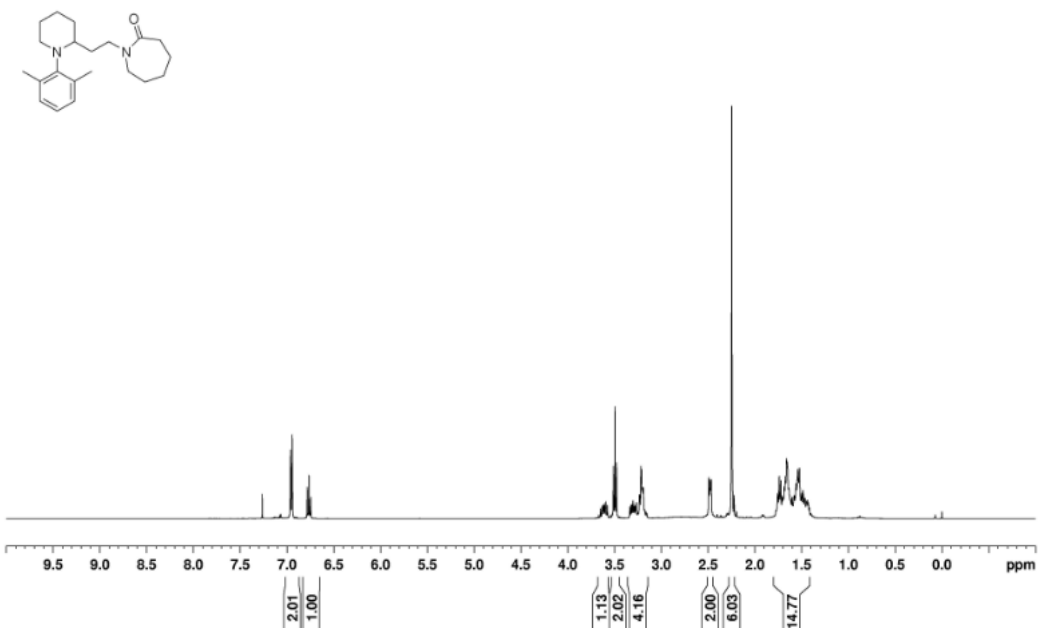

$^{13}\text{C}$  NMR spectrum of **4A<sub>3</sub>** ( $\text{CDCl}_3$ )

Sample:HYHF44-C13CPD  
CDCl<sub>3</sub>  
Date:2014-04-15

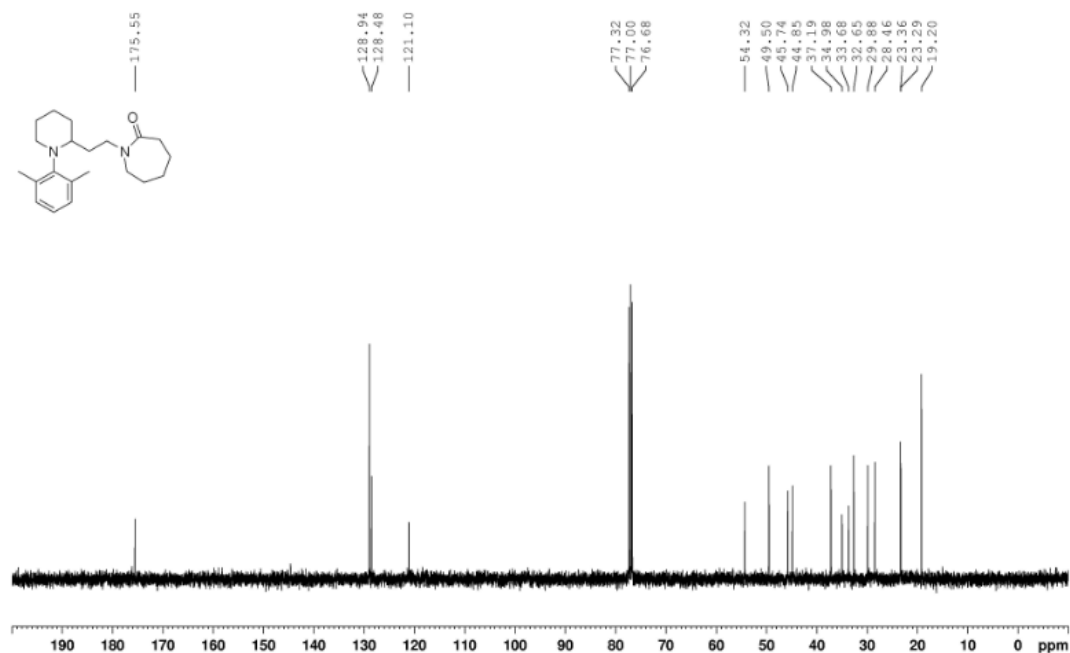



# <sup>1</sup>H NMR spectrum of **3a** (CDCl<sub>3</sub>)

Sample:HYHD28-PROTON256  
CDCl<sub>3</sub>  
Date:2013-06-17

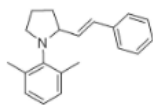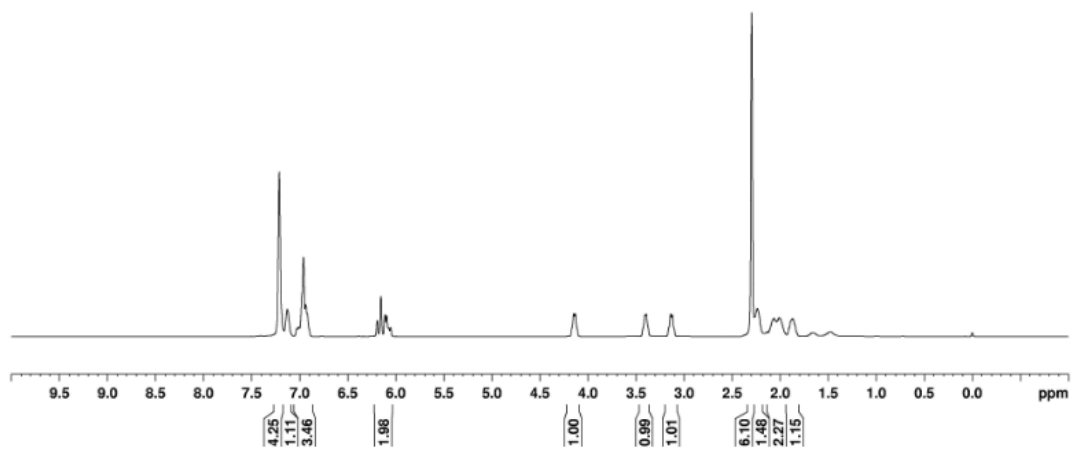

# <sup>13</sup>C NMR spectrum of **3a** (CDCl<sub>3</sub>)

Sample:HYHD2802-C13CPD  
CDCl<sub>3</sub>  
Date:2013-06-17

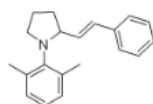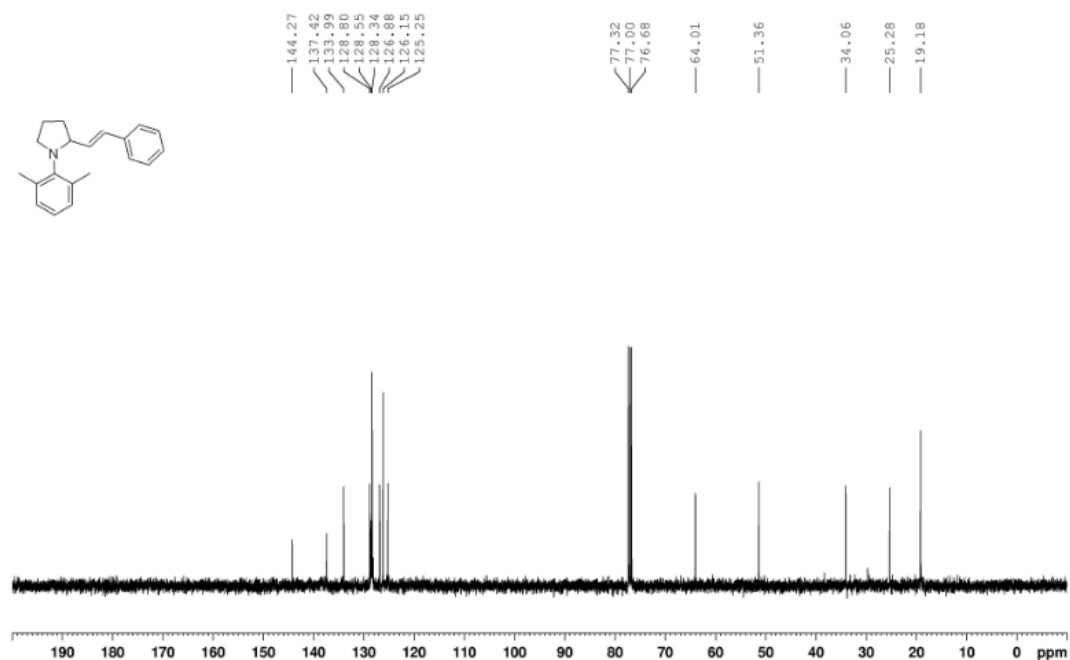

<sup>1</sup>H NMR spectrum of **4m** (CDCl<sub>3</sub>)

Sample:HYHD26-PROTON256  
CDCl<sub>3</sub>  
Date:2013-06-16

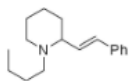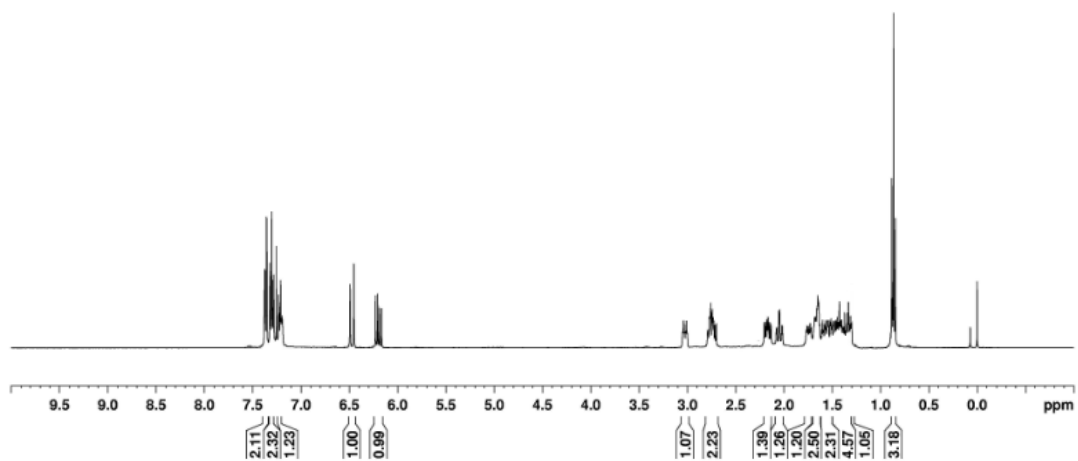

<sup>13</sup>C NMR spectrum of **4m** (CDCl<sub>3</sub>)

Sample:HYHD26-C13CPD  
CDCl<sub>3</sub>  
Date:2013-06-16

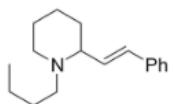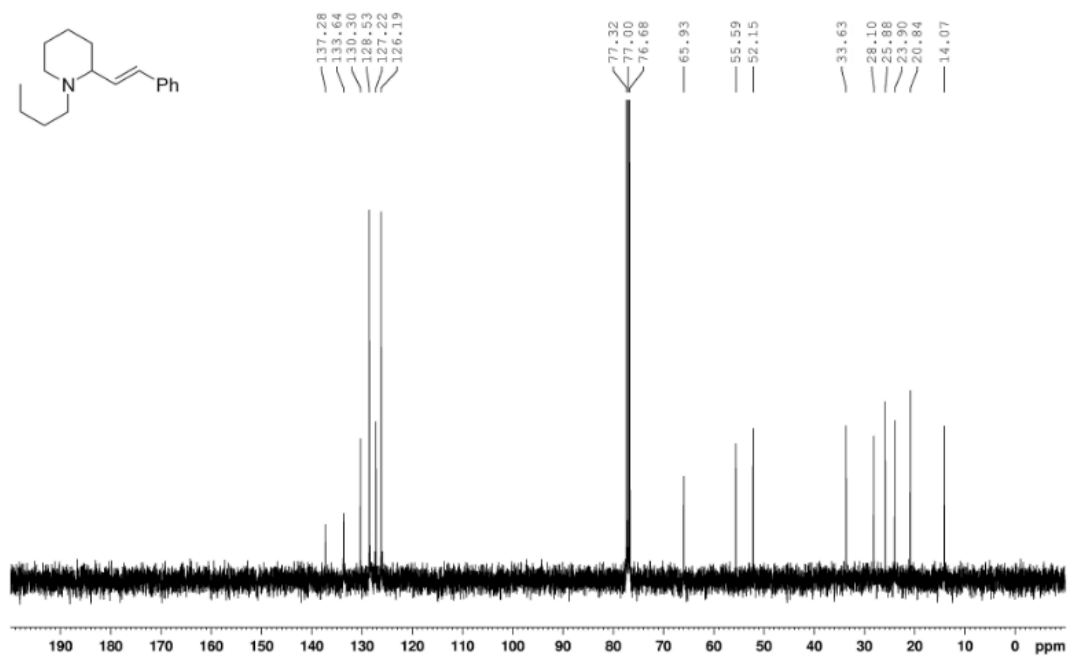

$^1\text{H}$  NMR spectrum of **3b** ( $\text{CDCl}_3$ )

Sample:HYHD8-PROTON256  
CDCl<sub>3</sub>  
Date:2013-05-31

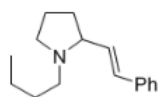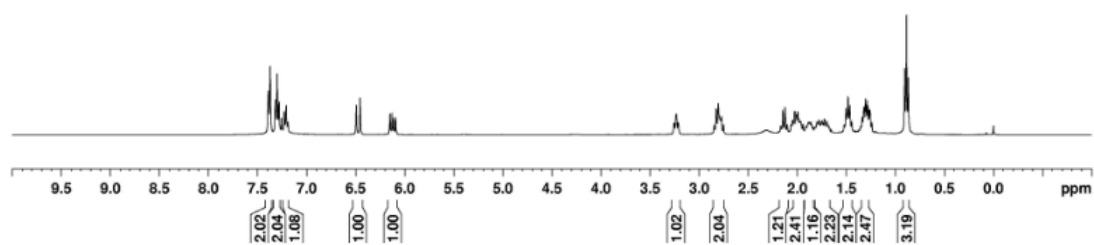

$^{13}\text{C}$  NMR spectrum of **3b** ( $\text{CDCl}_3$ )

Sample:HYHD8-C13CPD  
CDCl<sub>3</sub>  
Date:2013-05-31

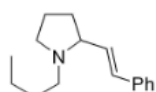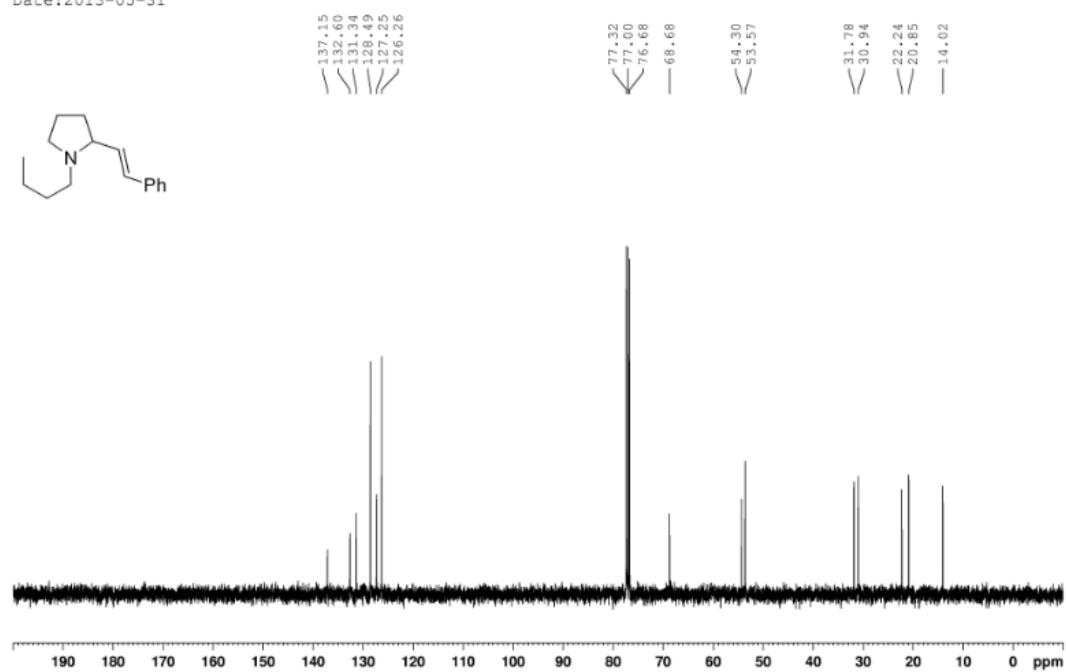

### $^1\text{H}$ NMR spectrum of **3c** ( $\text{CDCl}_3$ )

Sample: HYHD23-PROTON256  
CDCl<sub>3</sub>  
Date: 2013-06-08

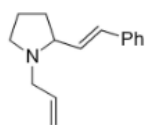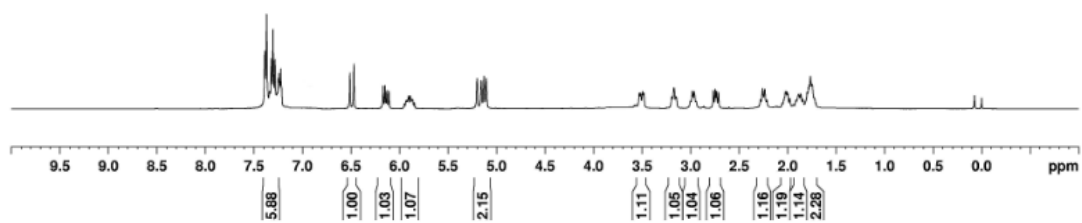

### $^{13}\text{C}$ NMR spectrum of **3c** ( $\text{CDCl}_3$ )

Sample: HYHD23-C13CPD  
CDCl<sub>3</sub>  
Date: 2013-07-03

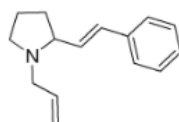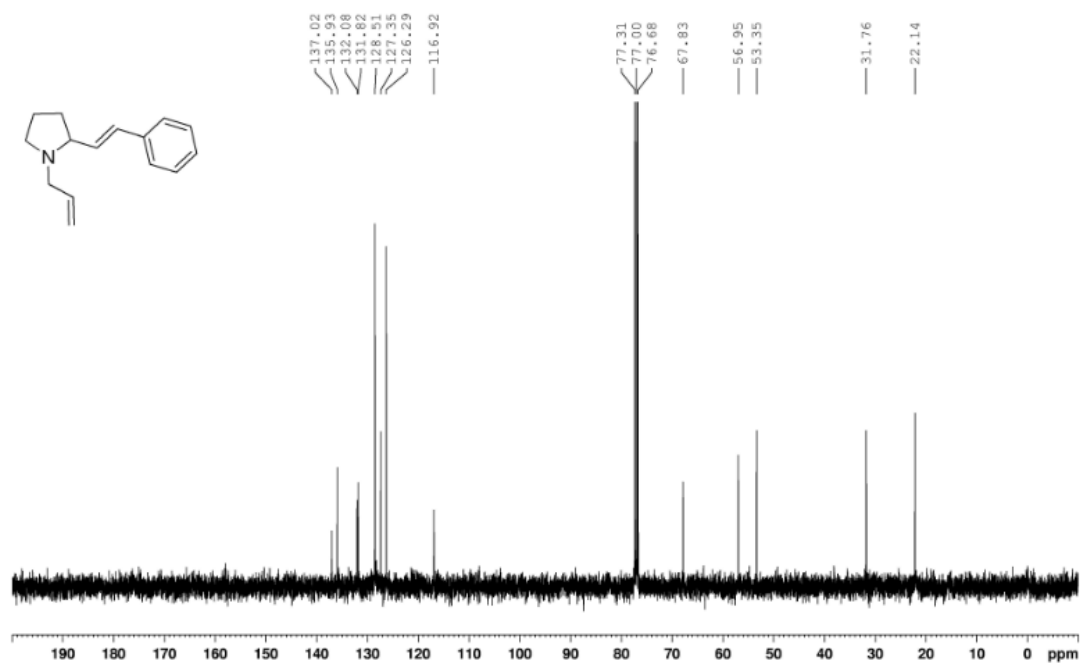

# $^1\text{H}$ NMR spectrum of **27** ( $\text{CDCl}_3$ )

Sample: HYHF23-B-PROTON256  
CDCl<sub>3</sub>  
Date: 2014-03-26

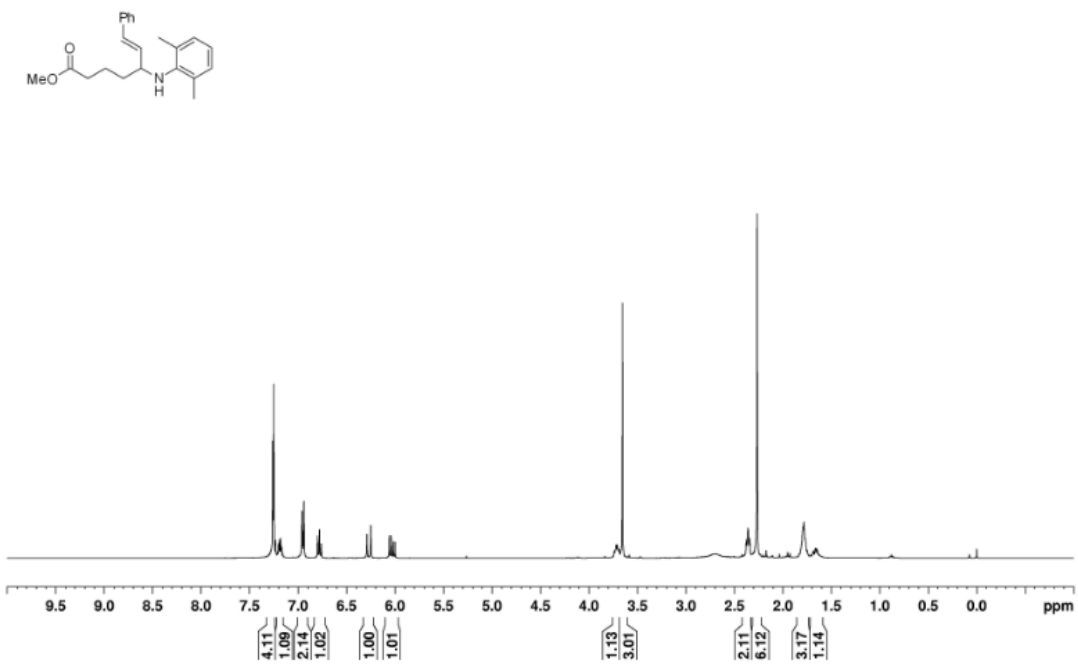

# $^{13}\text{C}$ NMR spectrum of **27** ( $\text{CDCl}_3$ )

HYHF23-B-C13CPD  
CDCl<sub>3</sub>  
2014-03-27

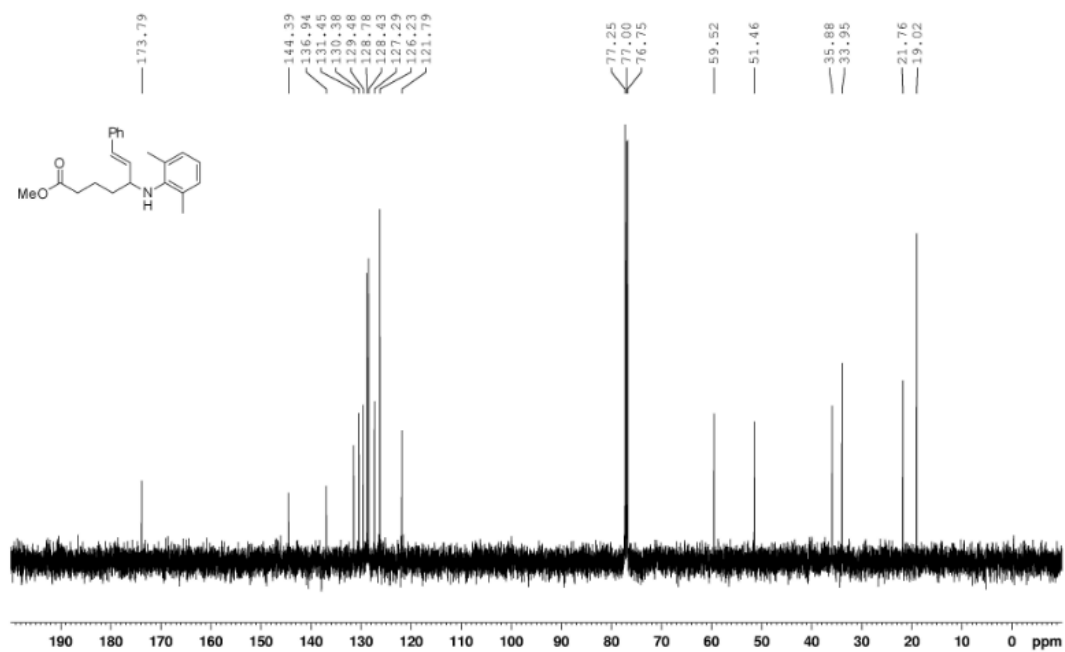

$^1\text{H}$  NMR spectrum of **27'** ( $\text{CDCl}_3$ )

Sample:HYHF23-A-PROTON256  
CDCl<sub>3</sub>  
Date:2014-03-26

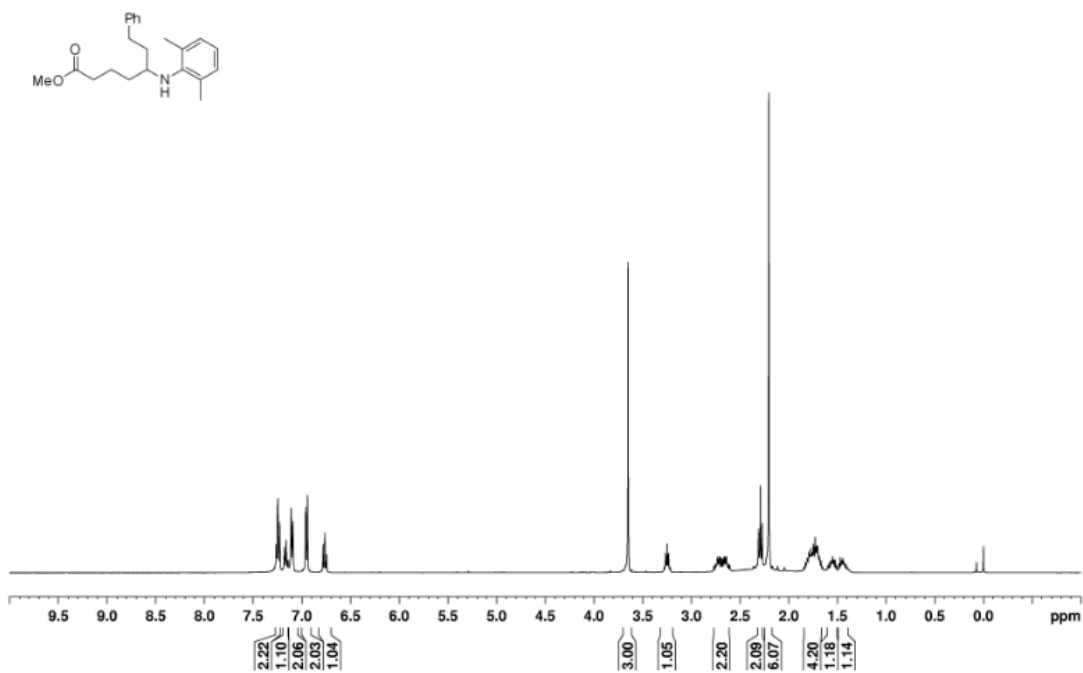

$^{13}\text{C}$  NMR spectrum of **27'** ( $\text{CDCl}_3$ )

HYHF23-A-C13CPD  
CDCl<sub>3</sub>  
2014-03-27

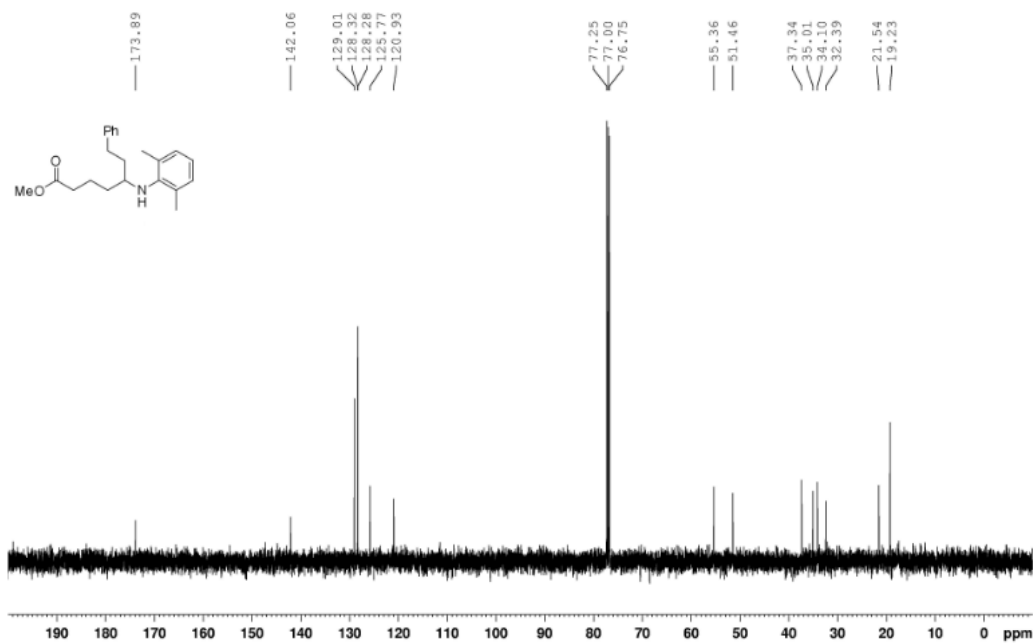

$^1\text{H}$  NMR spectrum of **28** ( $\text{CDCl}_3$ )

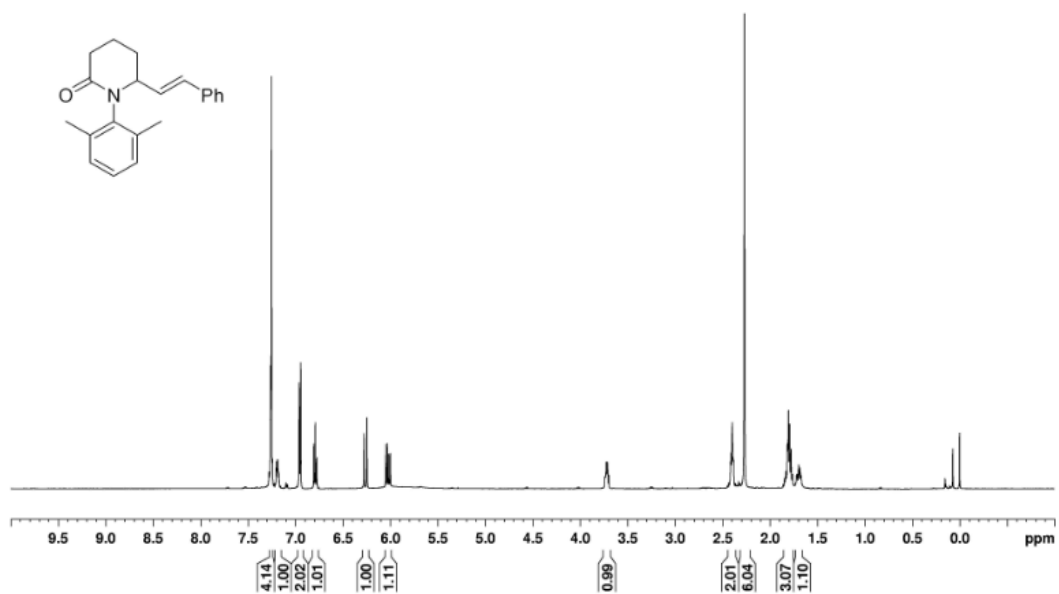

$^{13}\text{C}$  NMR spectrum of **28** ( $\text{CDCl}_3$ )

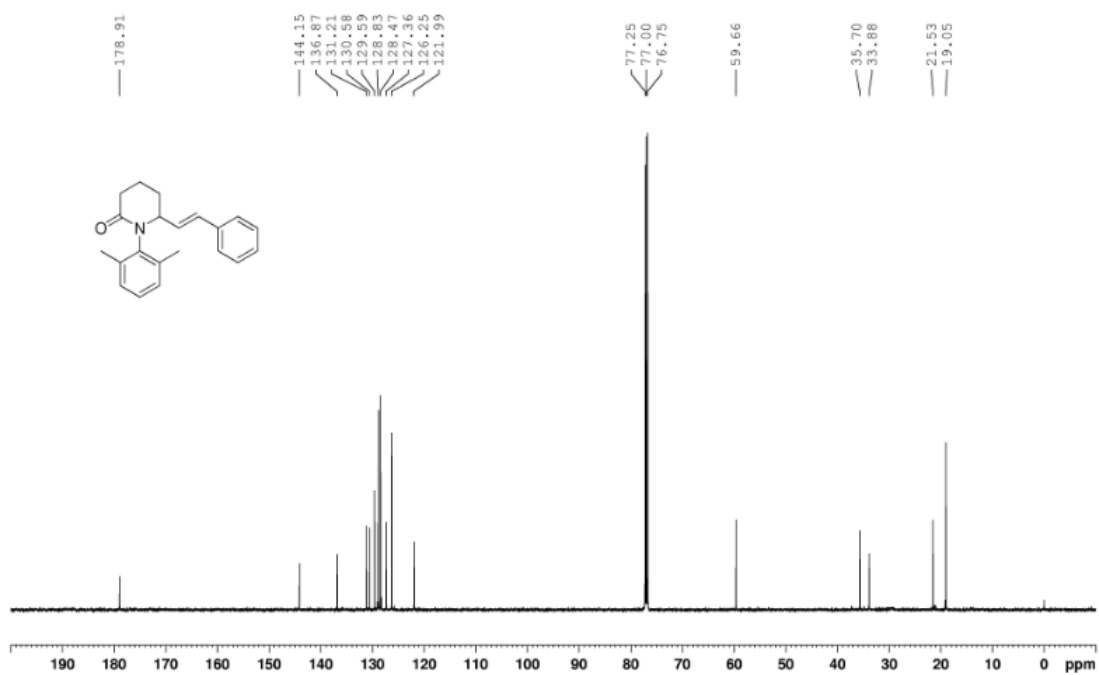

$^1\text{H}$  NMR spectrum of **5** ( $\text{CDCl}_3$ )

Sample:HYHH87-PROTON256  
CDCl<sub>3</sub>  
Date:2015-04-14

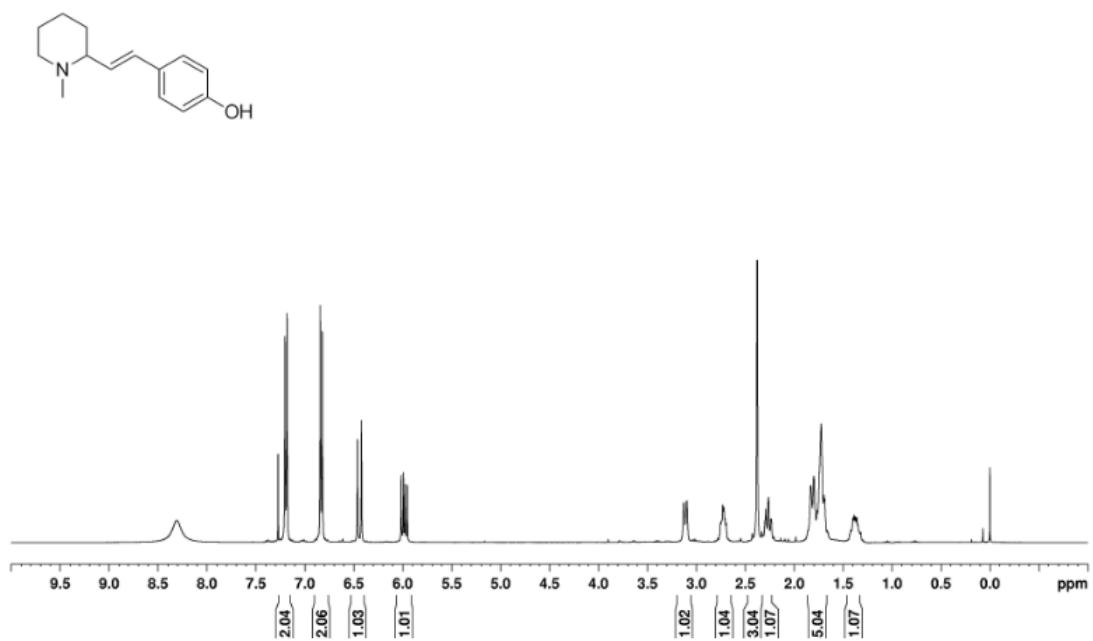

$^{13}\text{C}$  NMR spectrum of **5** ( $\text{CDCl}_3$ )

Sample:HYHH87-C13CPD  
CDCl<sub>3</sub>  
Date:2015-04-12

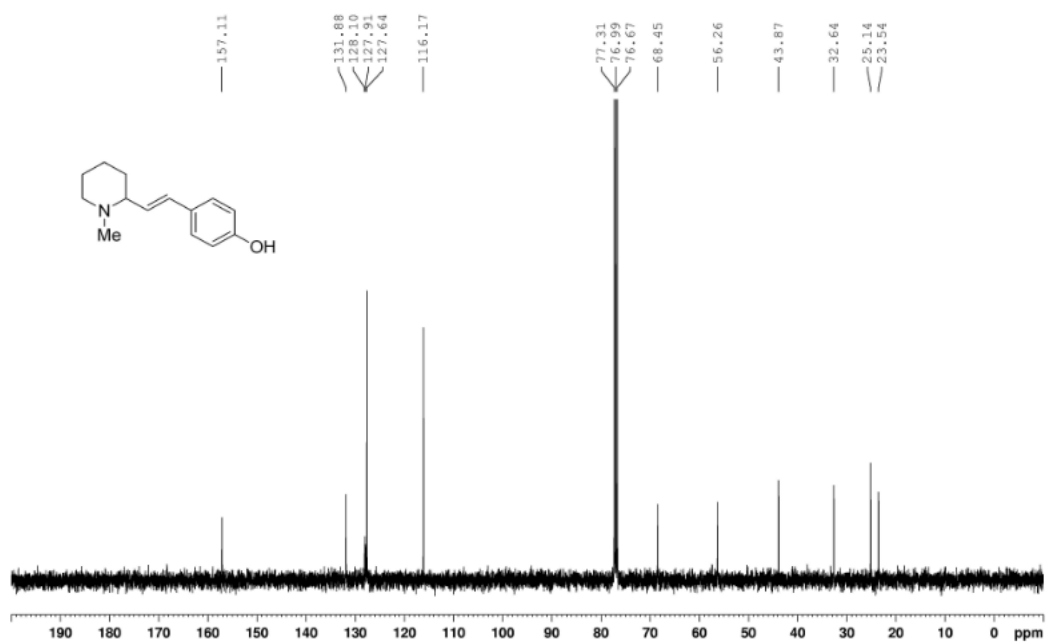



$^1\text{H}$  NMR spectrum of **4o** ( $\text{CDCl}_3$ )

Sample:HYHH67-PROTON256  
CDCl<sub>3</sub>  
Date:2015-04-04

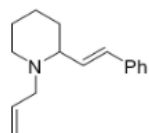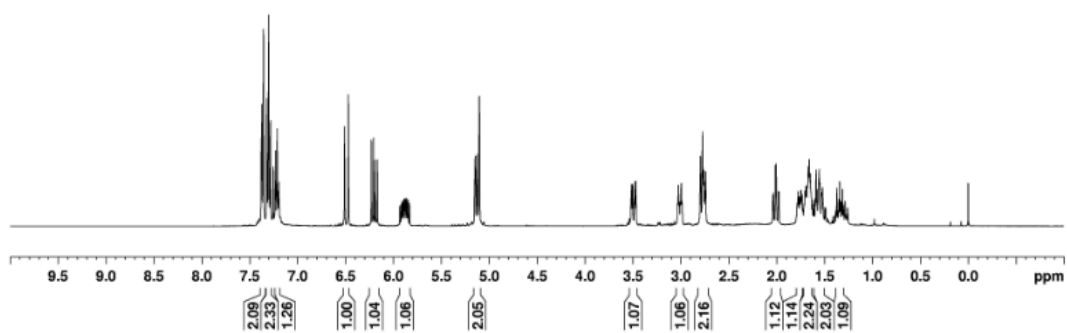

$^{13}\text{C}$  NMR spectrum of **4o** ( $\text{CDCl}_3$ )

Sample:HYHH69-C13CPD  
CDCl<sub>3</sub>  
Date:2015-04-02

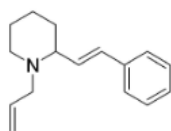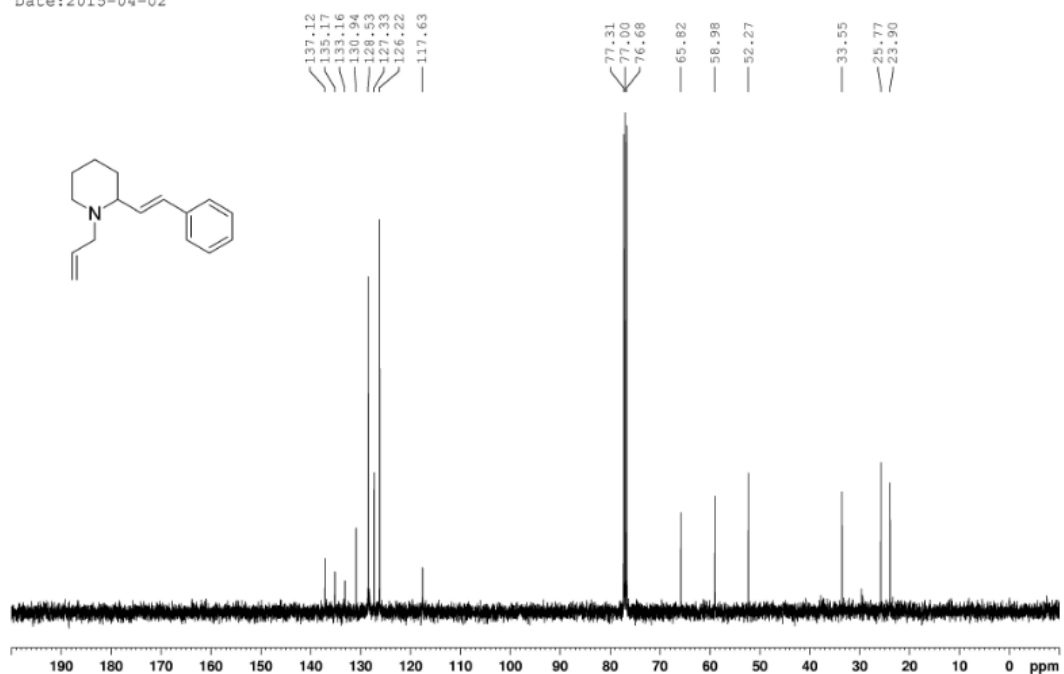

$^1\text{H}$  NMR spectrum of **3e** ( $\text{CDCl}_3$ )

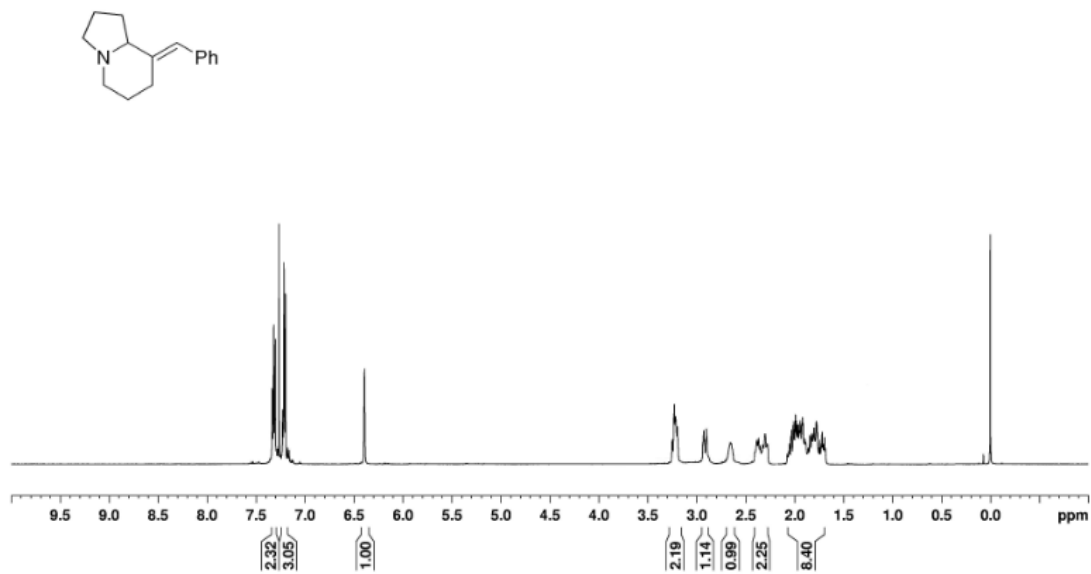

$^{13}\text{C}$  NMR spectrum of **3e** ( $\text{CDCl}_3$ )

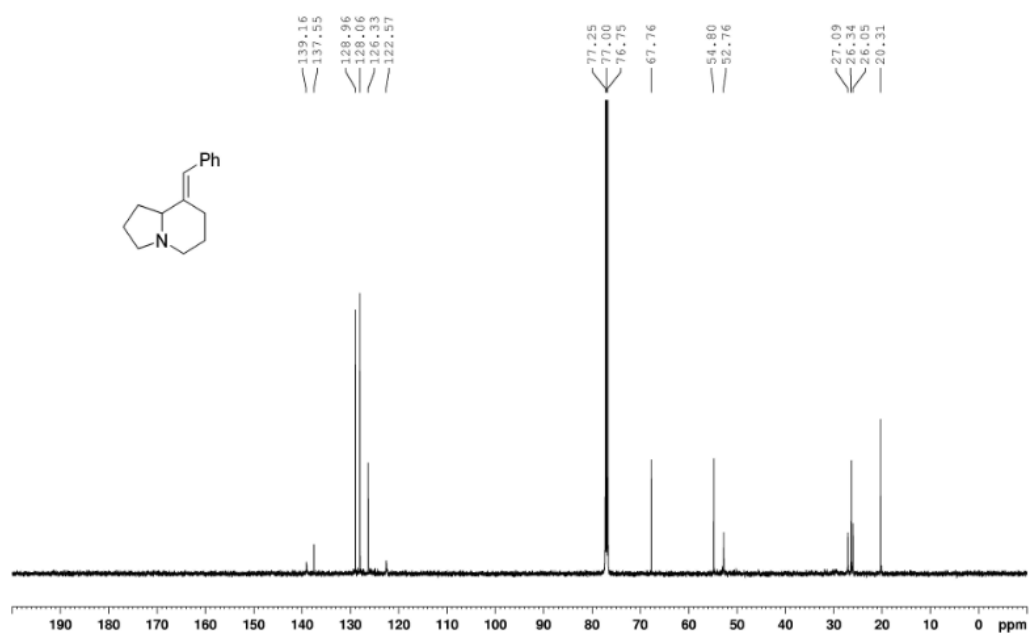

$^1\text{H}$  NMR spectrum of **4p** ( $\text{CDCl}_3$ )

Sample:HYHH86B-PROTON256  
CDCl<sub>3</sub>  
Date:2015-04-11

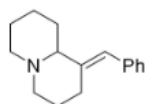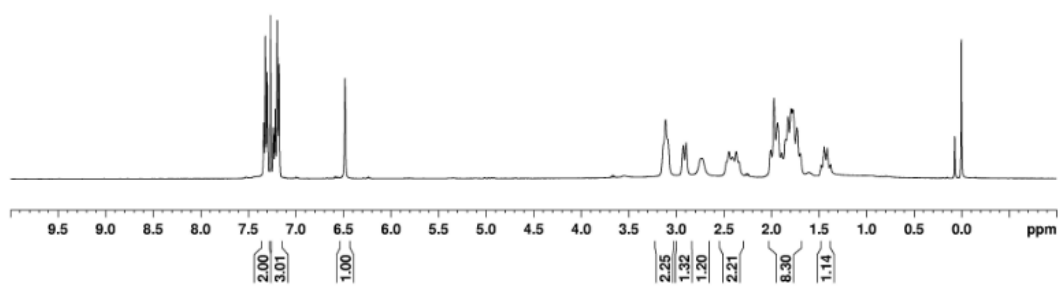

$^{13}\text{C}$  NMR spectrum of **4p** ( $\text{CDCl}_3$ )

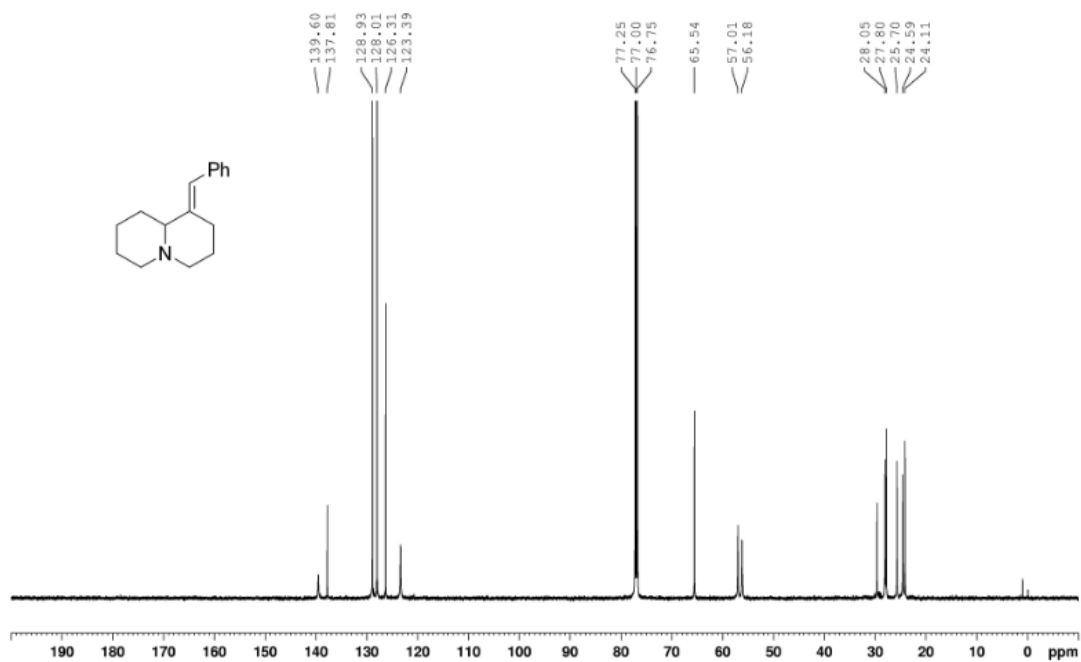

$^1\text{H}$  NMR spectrum of **22a** ( $\text{CDCl}_3$ )

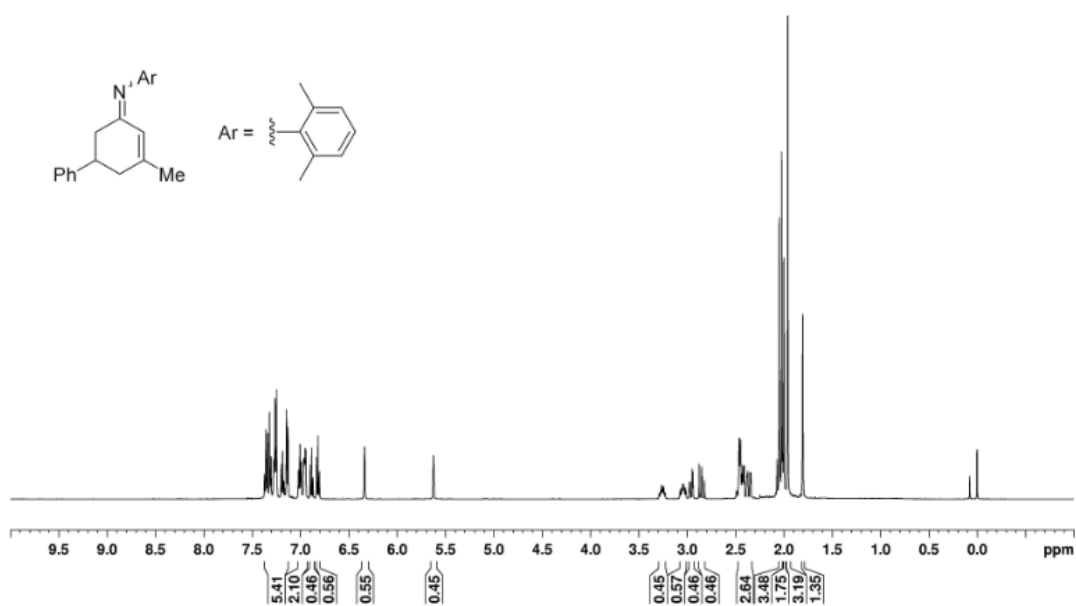

$^{13}\text{C}$  NMR spectrum of **22a** ( $\text{CDCl}_3$ )

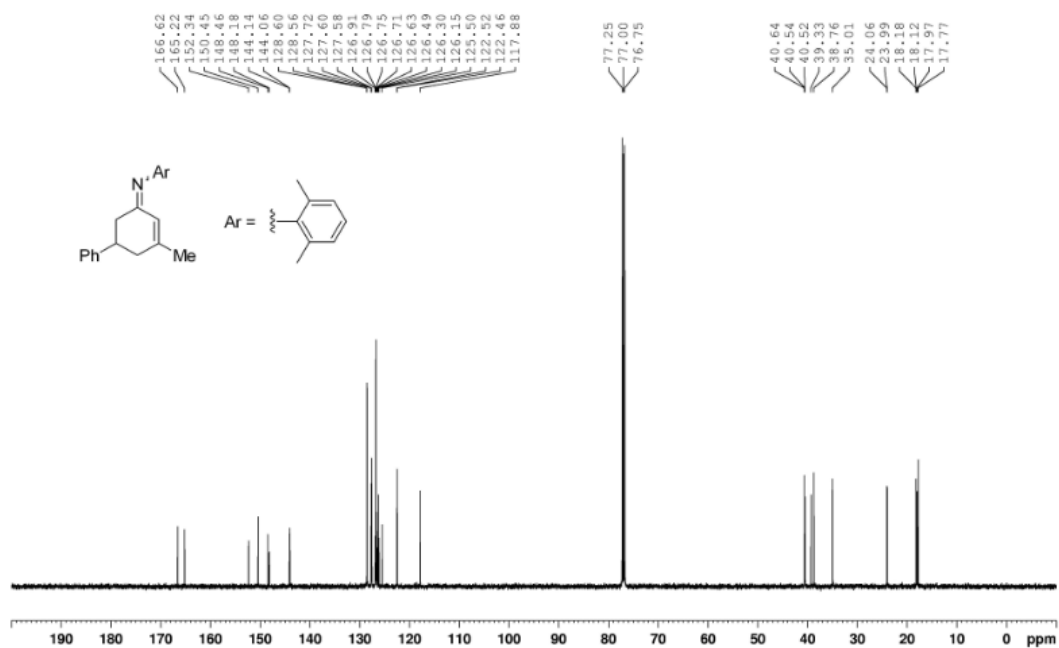

<sup>1</sup>H NMR spectrum of **22b** (CDCl<sub>3</sub>)

Sample:HYHF66-PROTON256  
CDCl<sub>3</sub>  
Date:2014-05-21

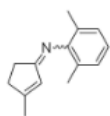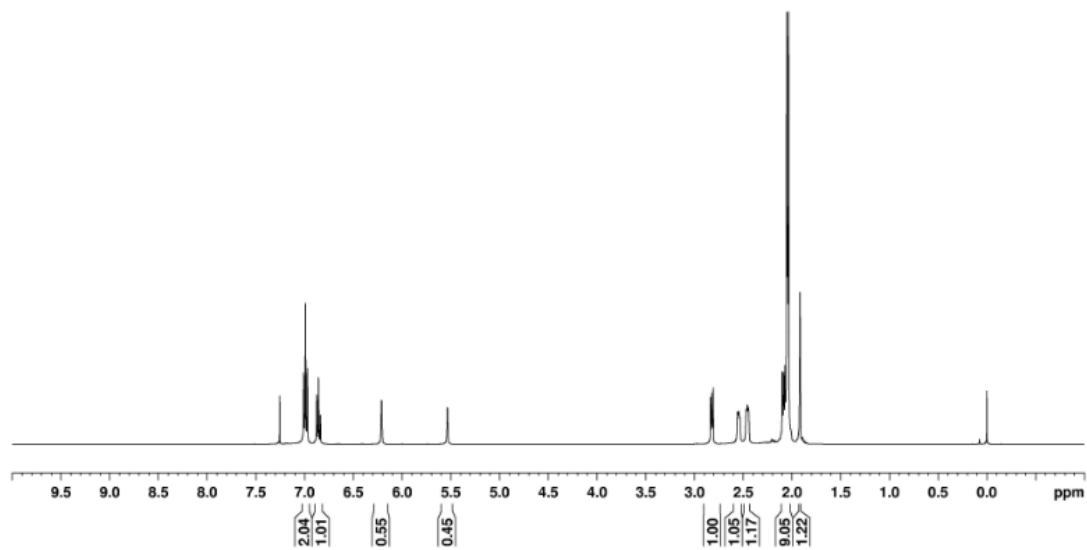

<sup>13</sup>C NMR spectrum of **22b** (CDCl<sub>3</sub>)

Sample:HYHF66-C13CPD  
CDCl<sub>3</sub>  
Date:2014-05-21

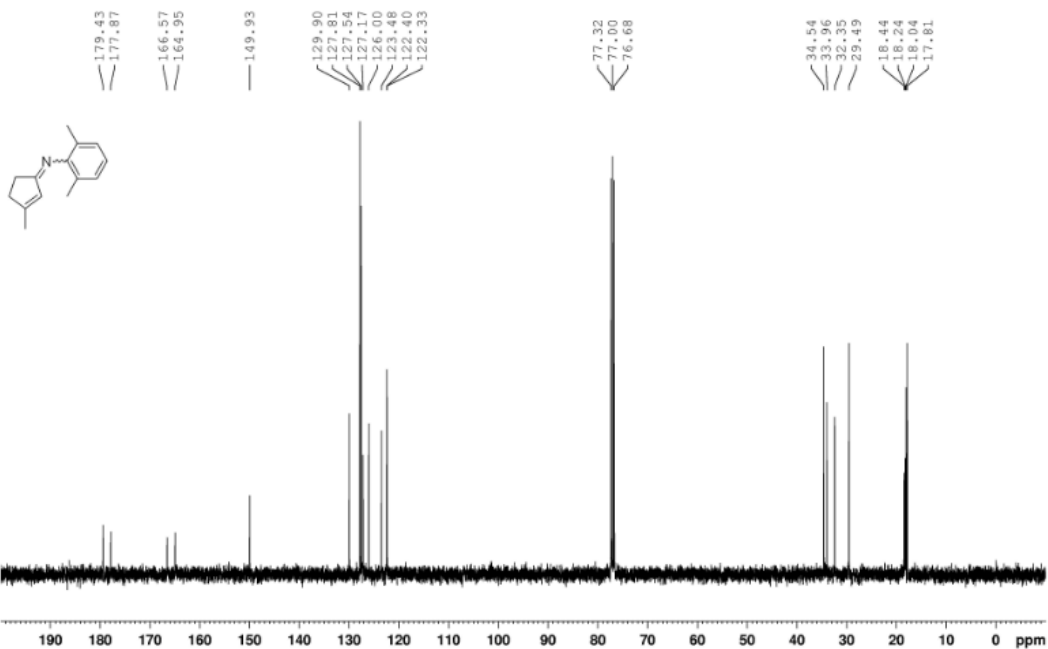

$^1\text{H}$  NMR spectrum of **33** ( $\text{CDCl}_3$ )

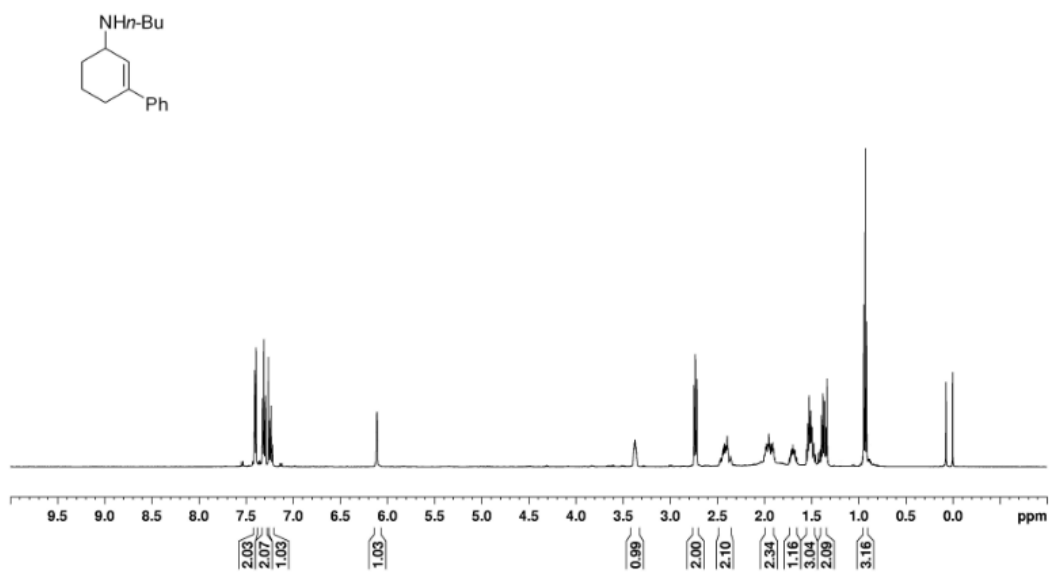

$^{13}\text{C}$  NMR spectrum of **33** ( $\text{CDCl}_3$ )

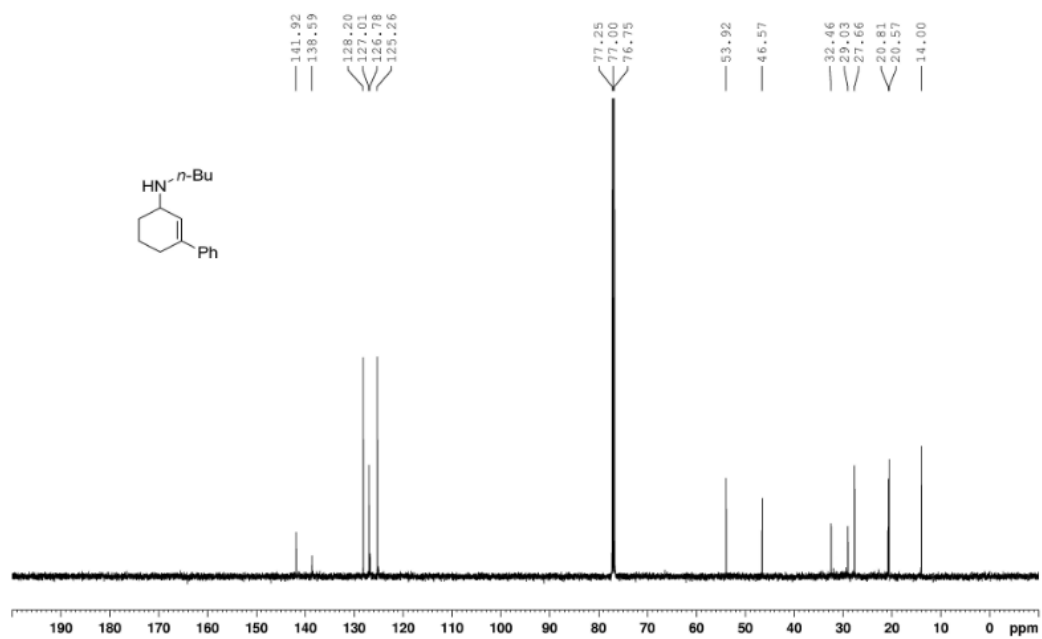

<sup>1</sup>H NMR spectrum of **23** (CDCl<sub>3</sub>)

Sample:HYHC108-PROTON256  
CDCl<sub>3</sub>  
Date:2013-05-08

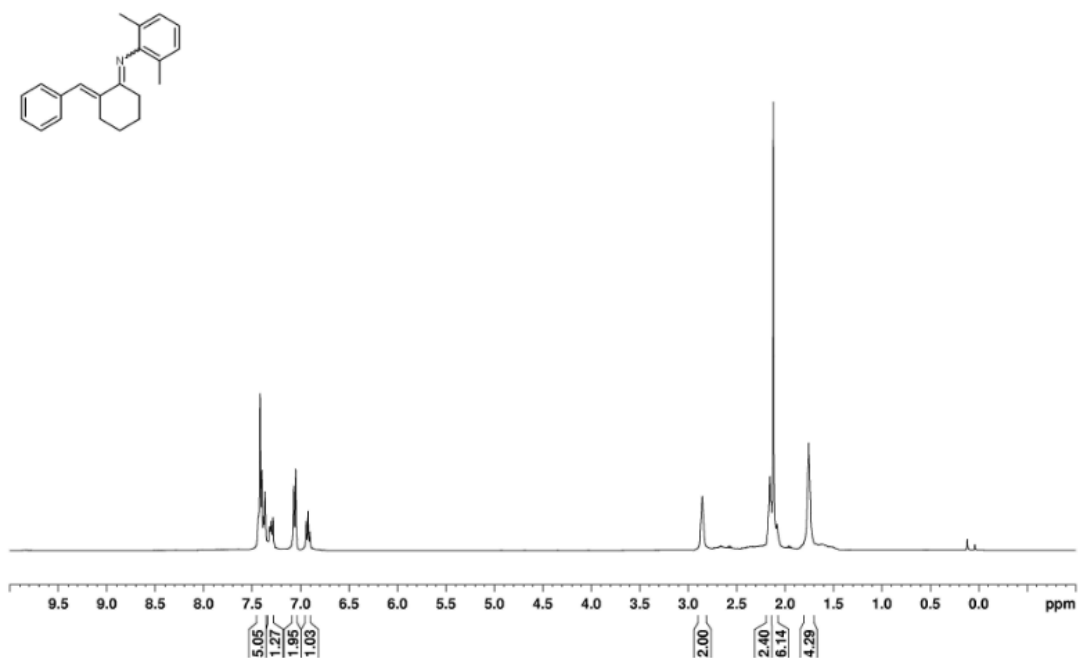

<sup>13</sup>C NMR spectrum of **23** (CDCl<sub>3</sub>)

Sample:HYHC108-C13CPD  
CDCl<sub>3</sub>  
Date:2013-05-08

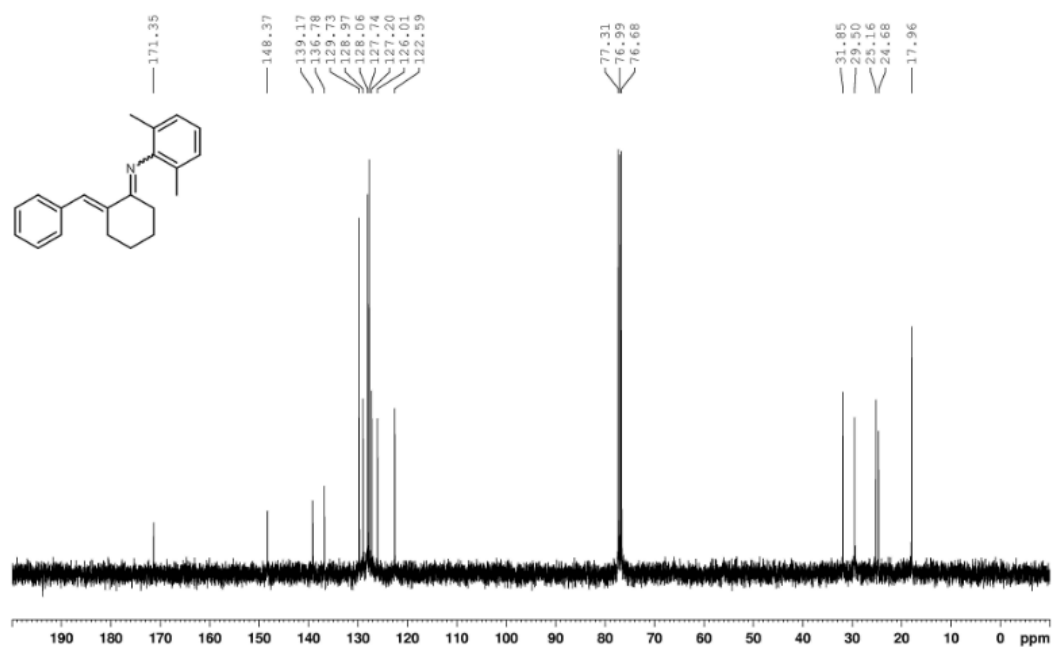

Supplement: c6qo00720a1.pdf [file c6qo00720a1.pdf]
